# Supplementary material for: µID-TIMS: spatially resolved high-precision U–Pb zircon geochronology
Source: Copernicus journal article supplement (doi:10.5194/gchron-6-621-2024), 2024-11-26
Supplement: Supplementary file 1 [file gchron-6-621-2024-supplement.zip]

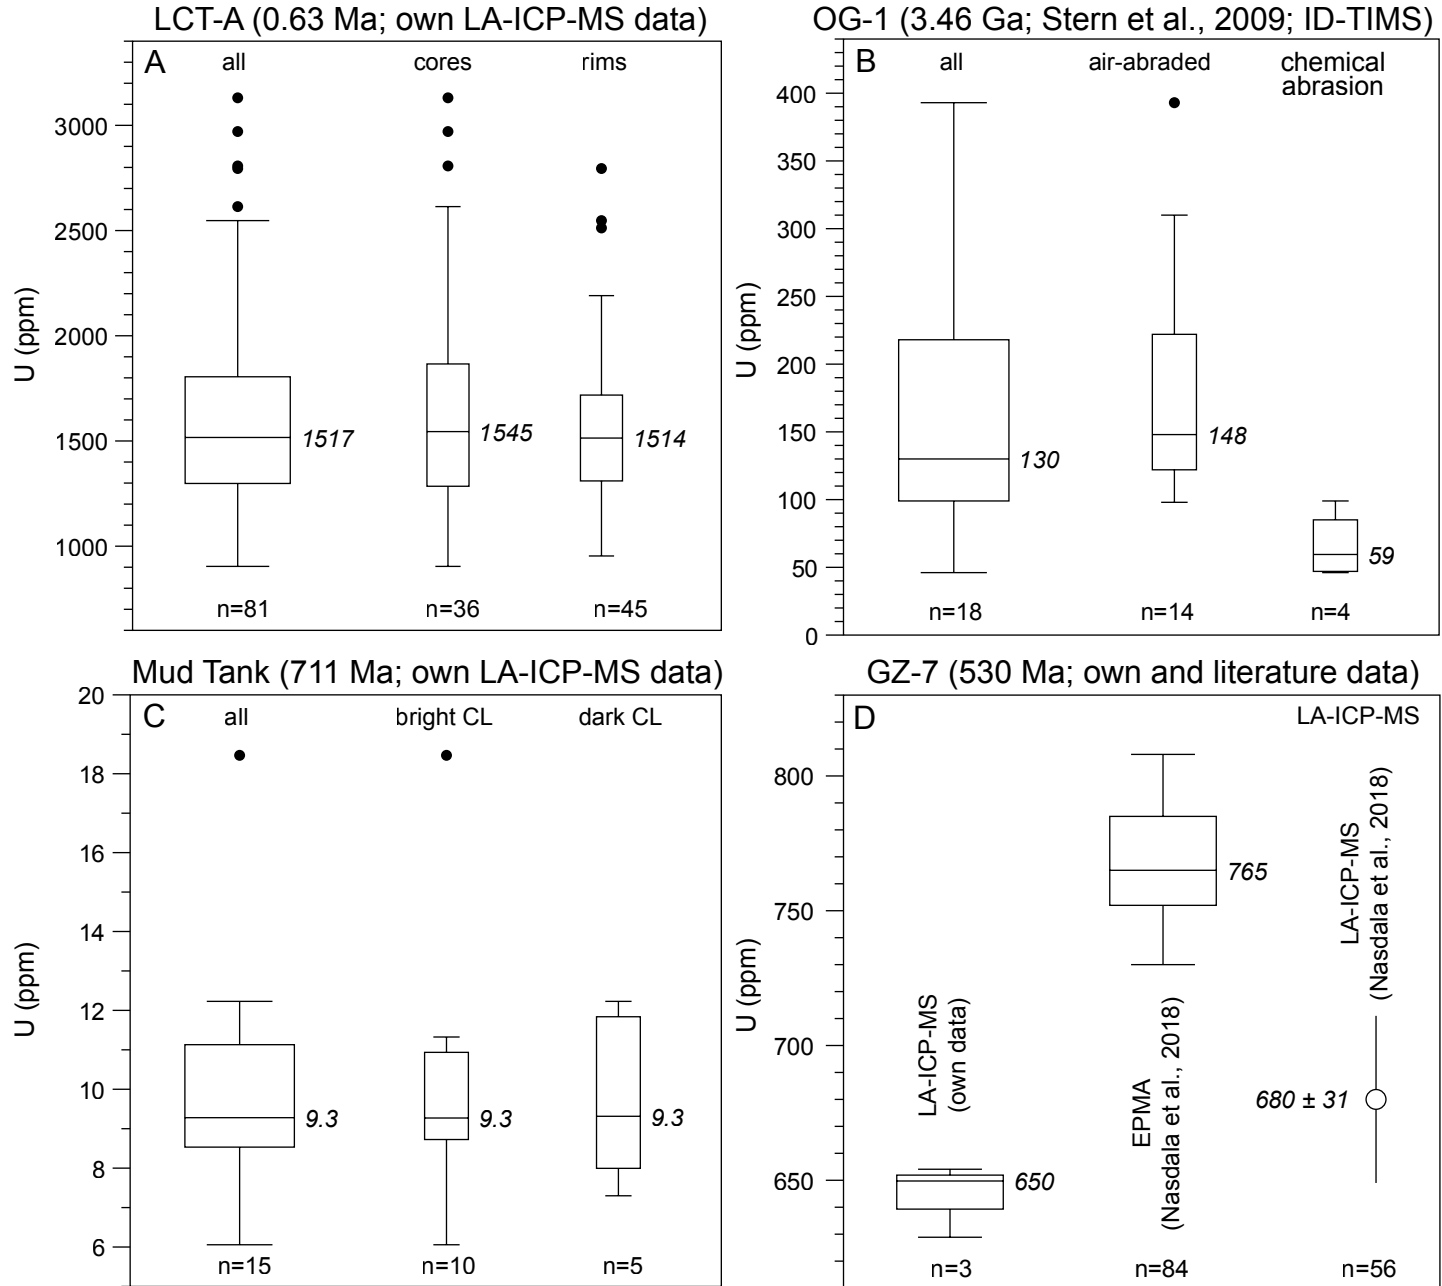

Figure S1: U concentration (ppm) of test zircon used in this study. LCT-A-Lava Creek Tuff Unit A zircon, OG-1-Owens Gully Diorite zircon.



# Xe<sup>+</sup> PFIB Microsampling of GZ7 Zircon – SEM View

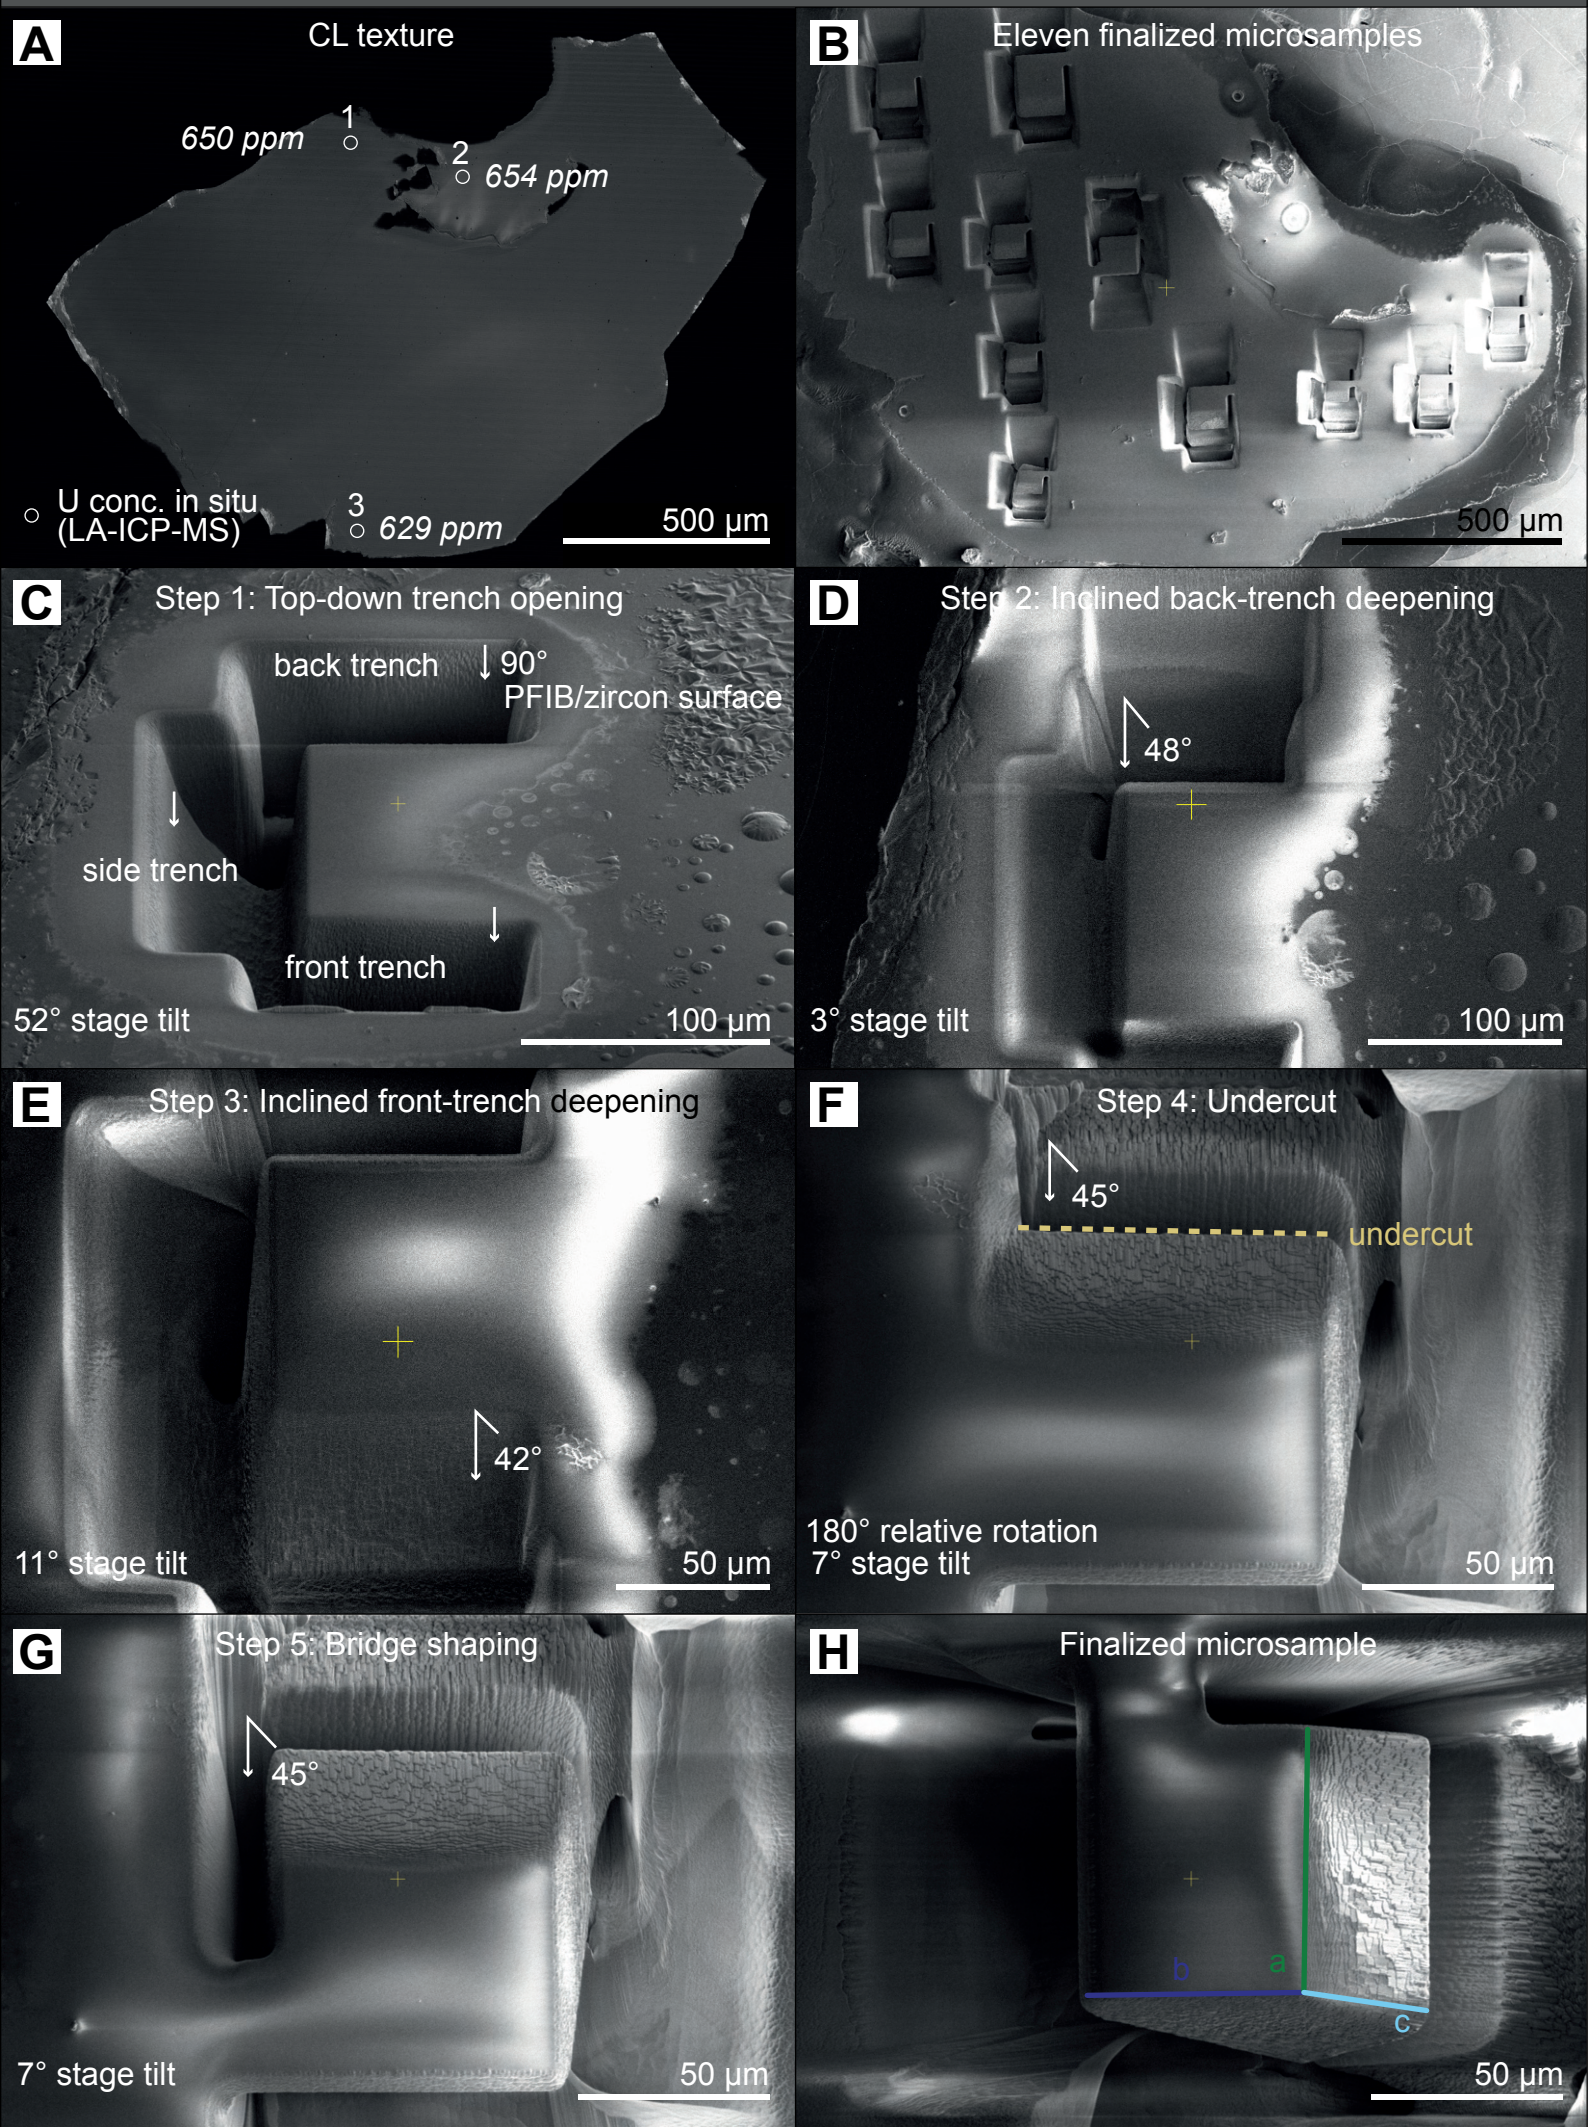

Figure S2: (A) Cathodoluminescence (CL) texture and in situ U concentration of the microsampled GZ7 zircon reference material. (B) Eleven microsamples of GZ7 zircon machined using Xe<sup>+</sup> PFIB. (C–H) Scanning electron microscope view of the step-by-step microsampling procedure. Angles next to arrows refer to angles of the PFIB objective with respect to zircon surface at different machining steps. (H) Sides labelled a, b and c correspond to those in Figure 6B and C in the main text.



**Xe<sup>+</sup> FIB Microsampling of GZ7 Zircon – PFIB View**

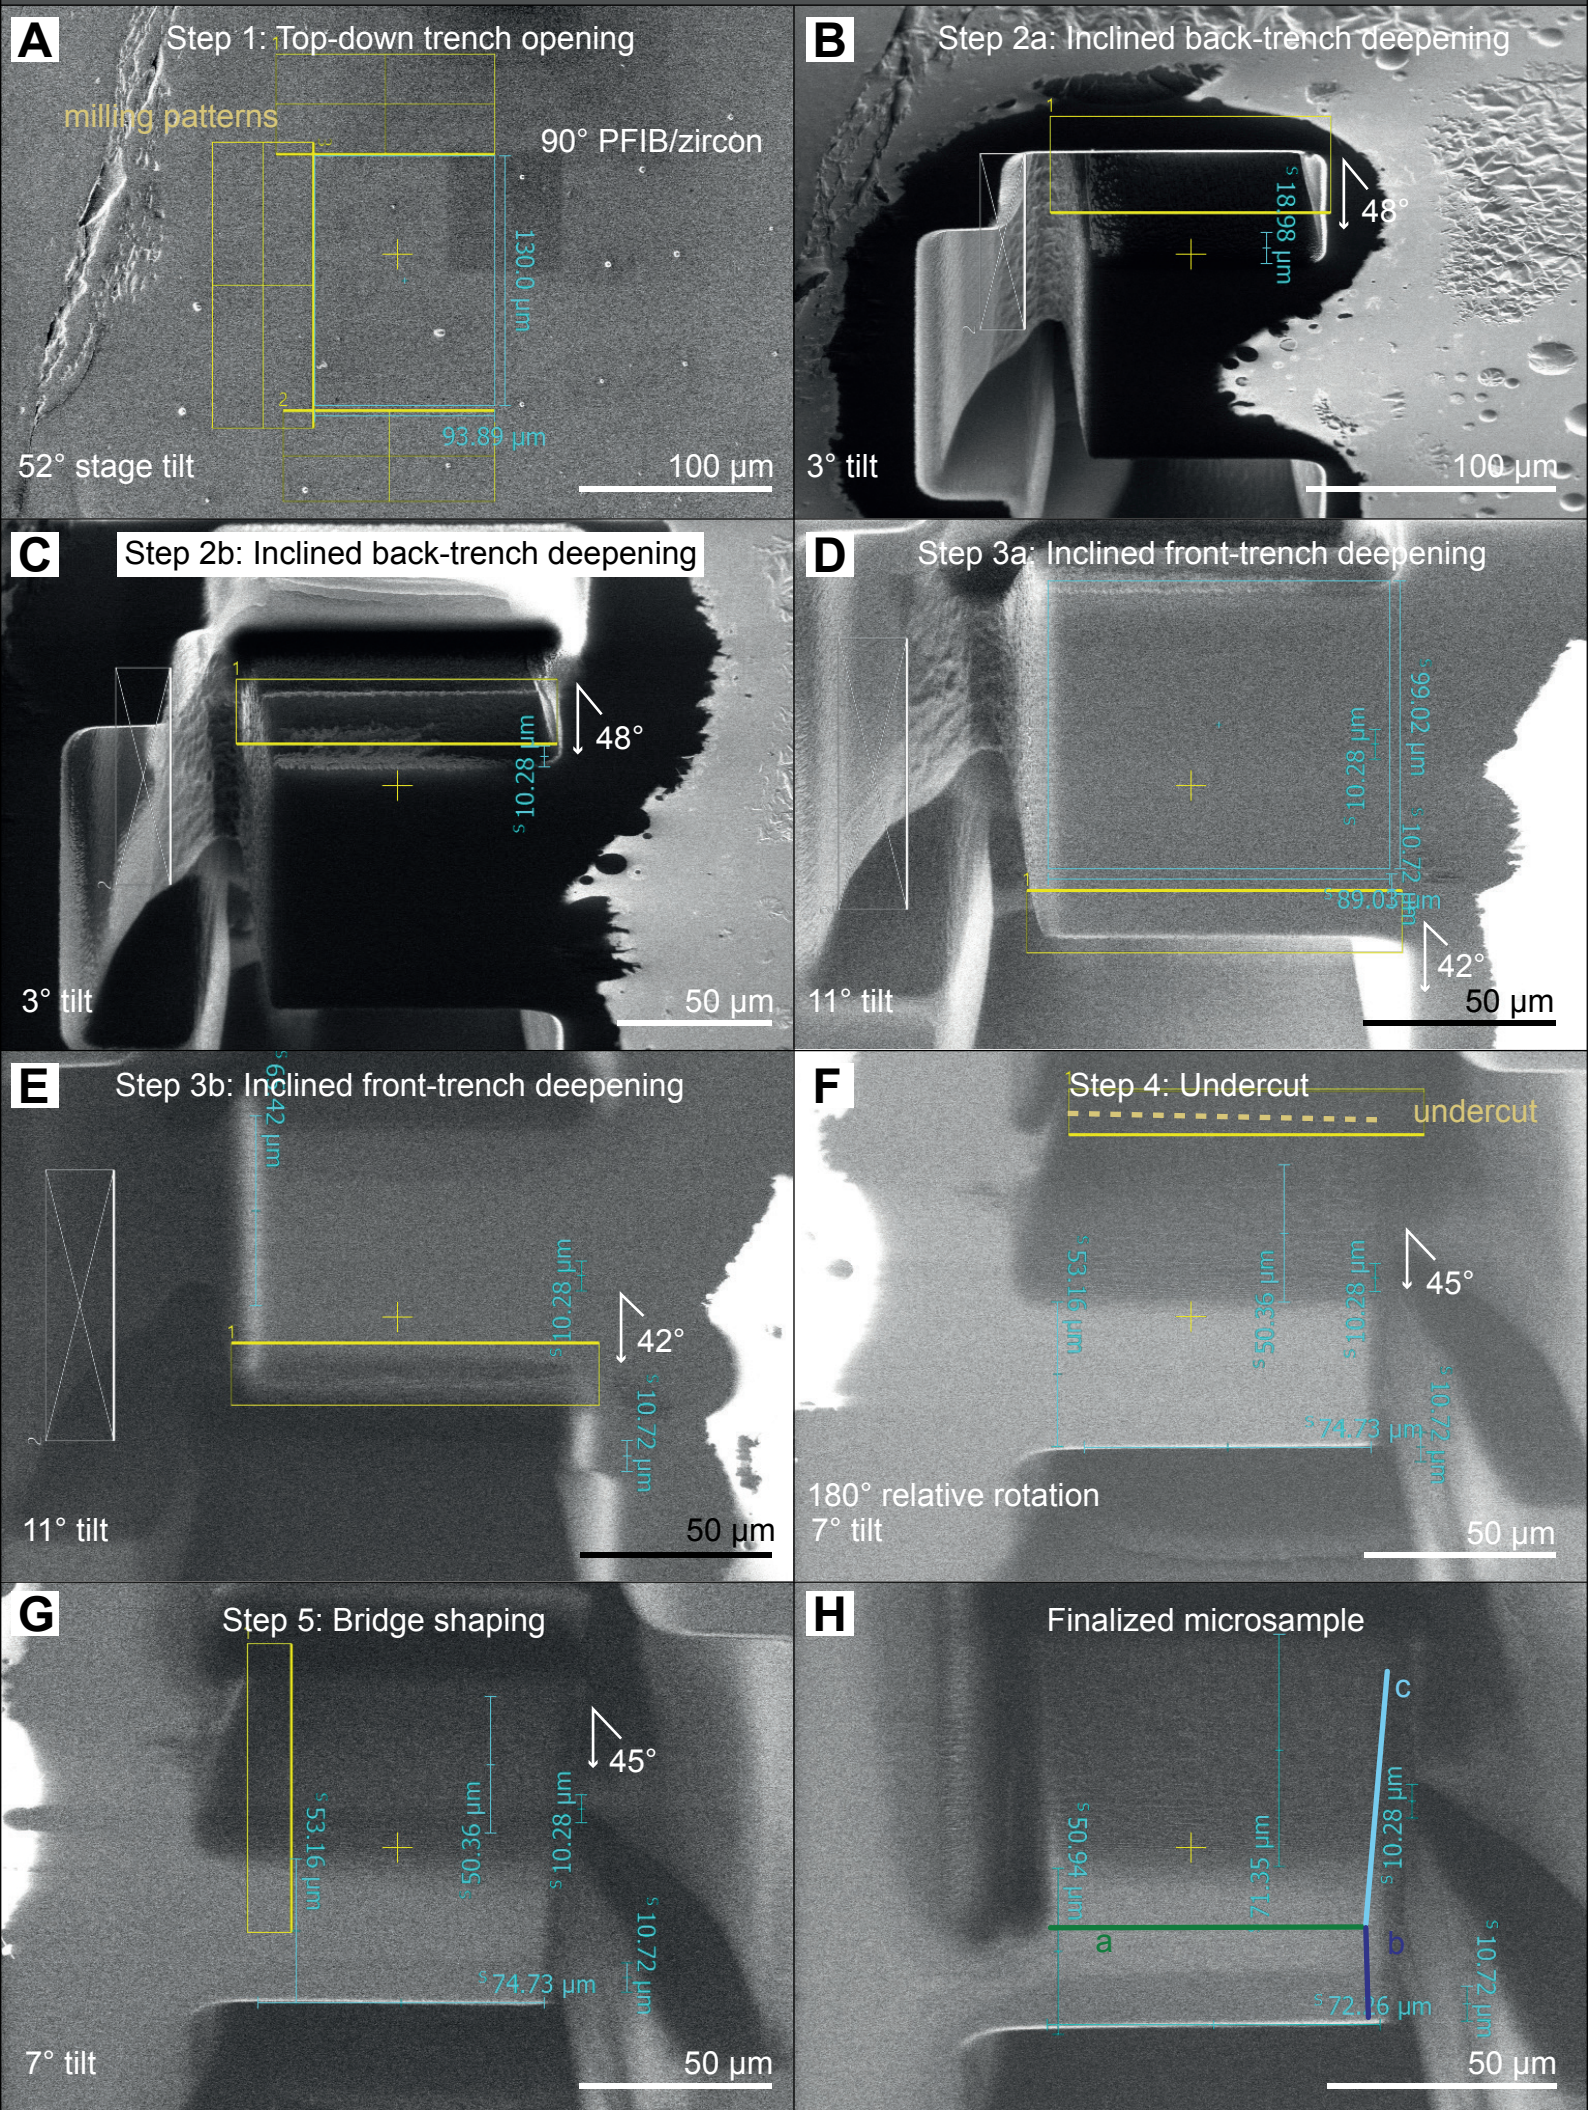

Figure S3: (A–H) Plasma focused ion beam (PFIB) view of the step-by-step zircon microsampling. Yellow rectangles represent PFIB machining patterns. Angles next to arrows refer to angles of the PFIB objective with respect to zircon surface at different machining steps. (H) Sides labelled a, b and c correspond to those in Figure 6B and C in the main text.



# Femtosecond Laser Microsampling of GZ7 Zircon – SEM View

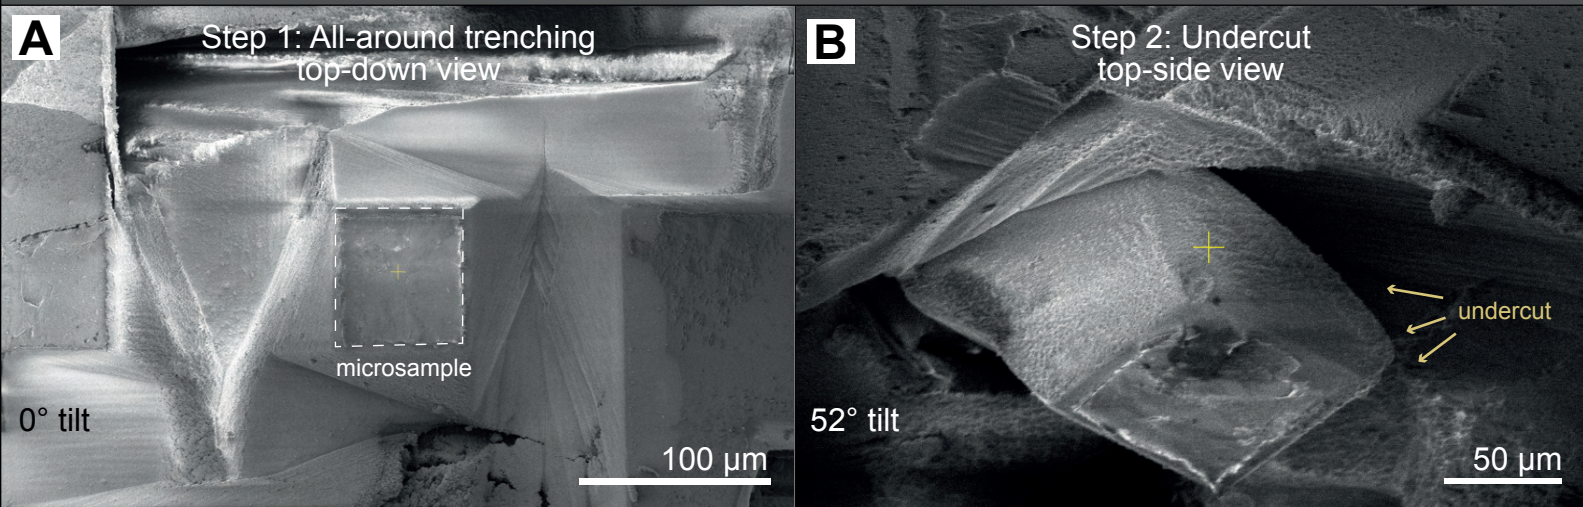

Figure S4: (A) Initial trench opening and (B) undercut during femtosecond laser zircon microsampling.



# Xe<sup>+</sup> Ion Beam Irradiation Experiments – Fera3 PFIB

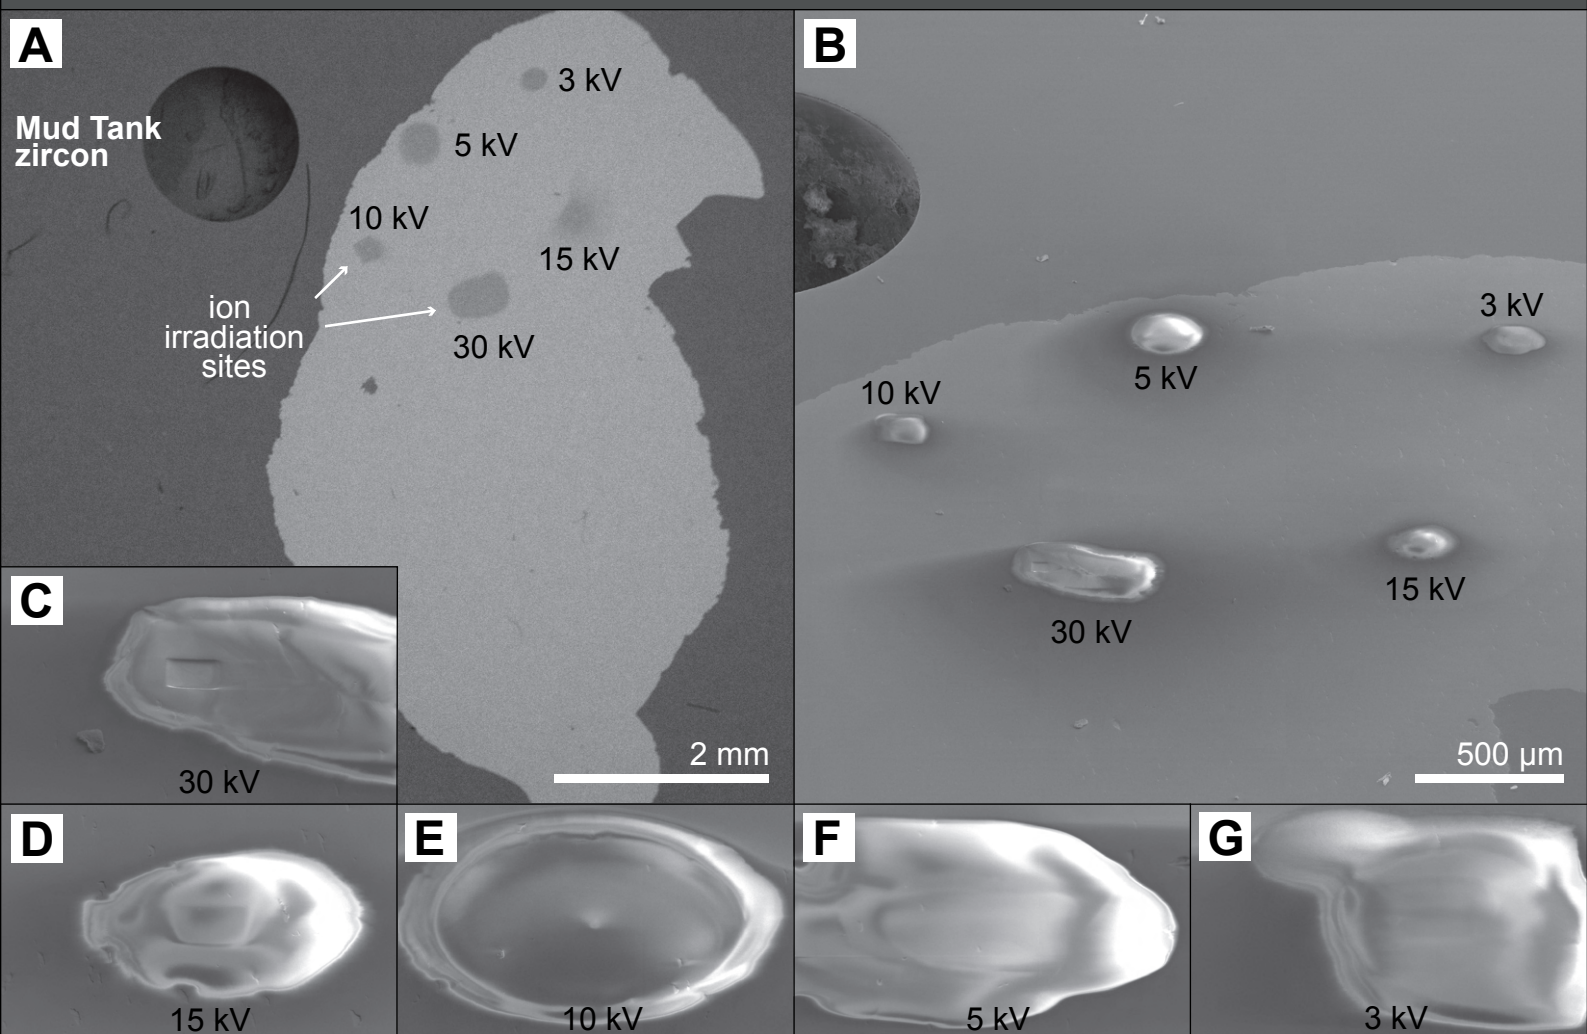

## TEM Lamella Preparation – Helios 5UX Ga<sup>+</sup> LMIS FIB

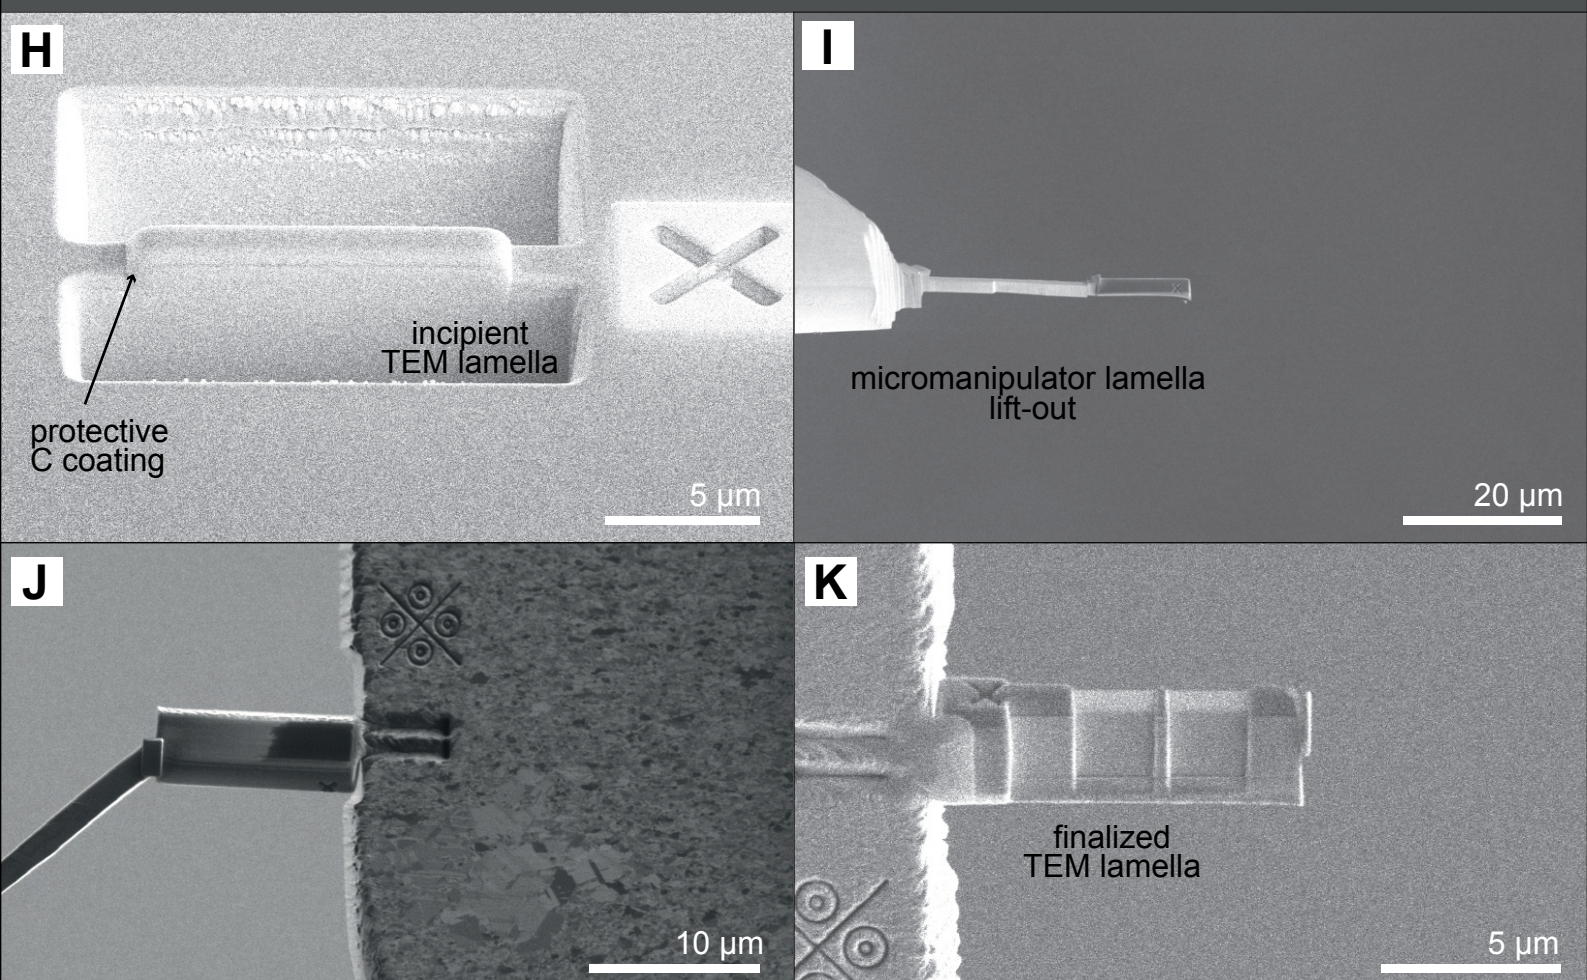

Figure S5: (A–G) Xe<sup>+</sup> irradiation experiments at different voltages (30–3 kV) on Fera3 PFIB and (H–K) preparation of TEM lamellae from the irradiated sites. LMIS-liquid metal ion source.



# Xe<sup>+</sup>/Ar<sup>+</sup> Ion Beam Irradiation Experiments – Helios 5 Laser Hydra UX

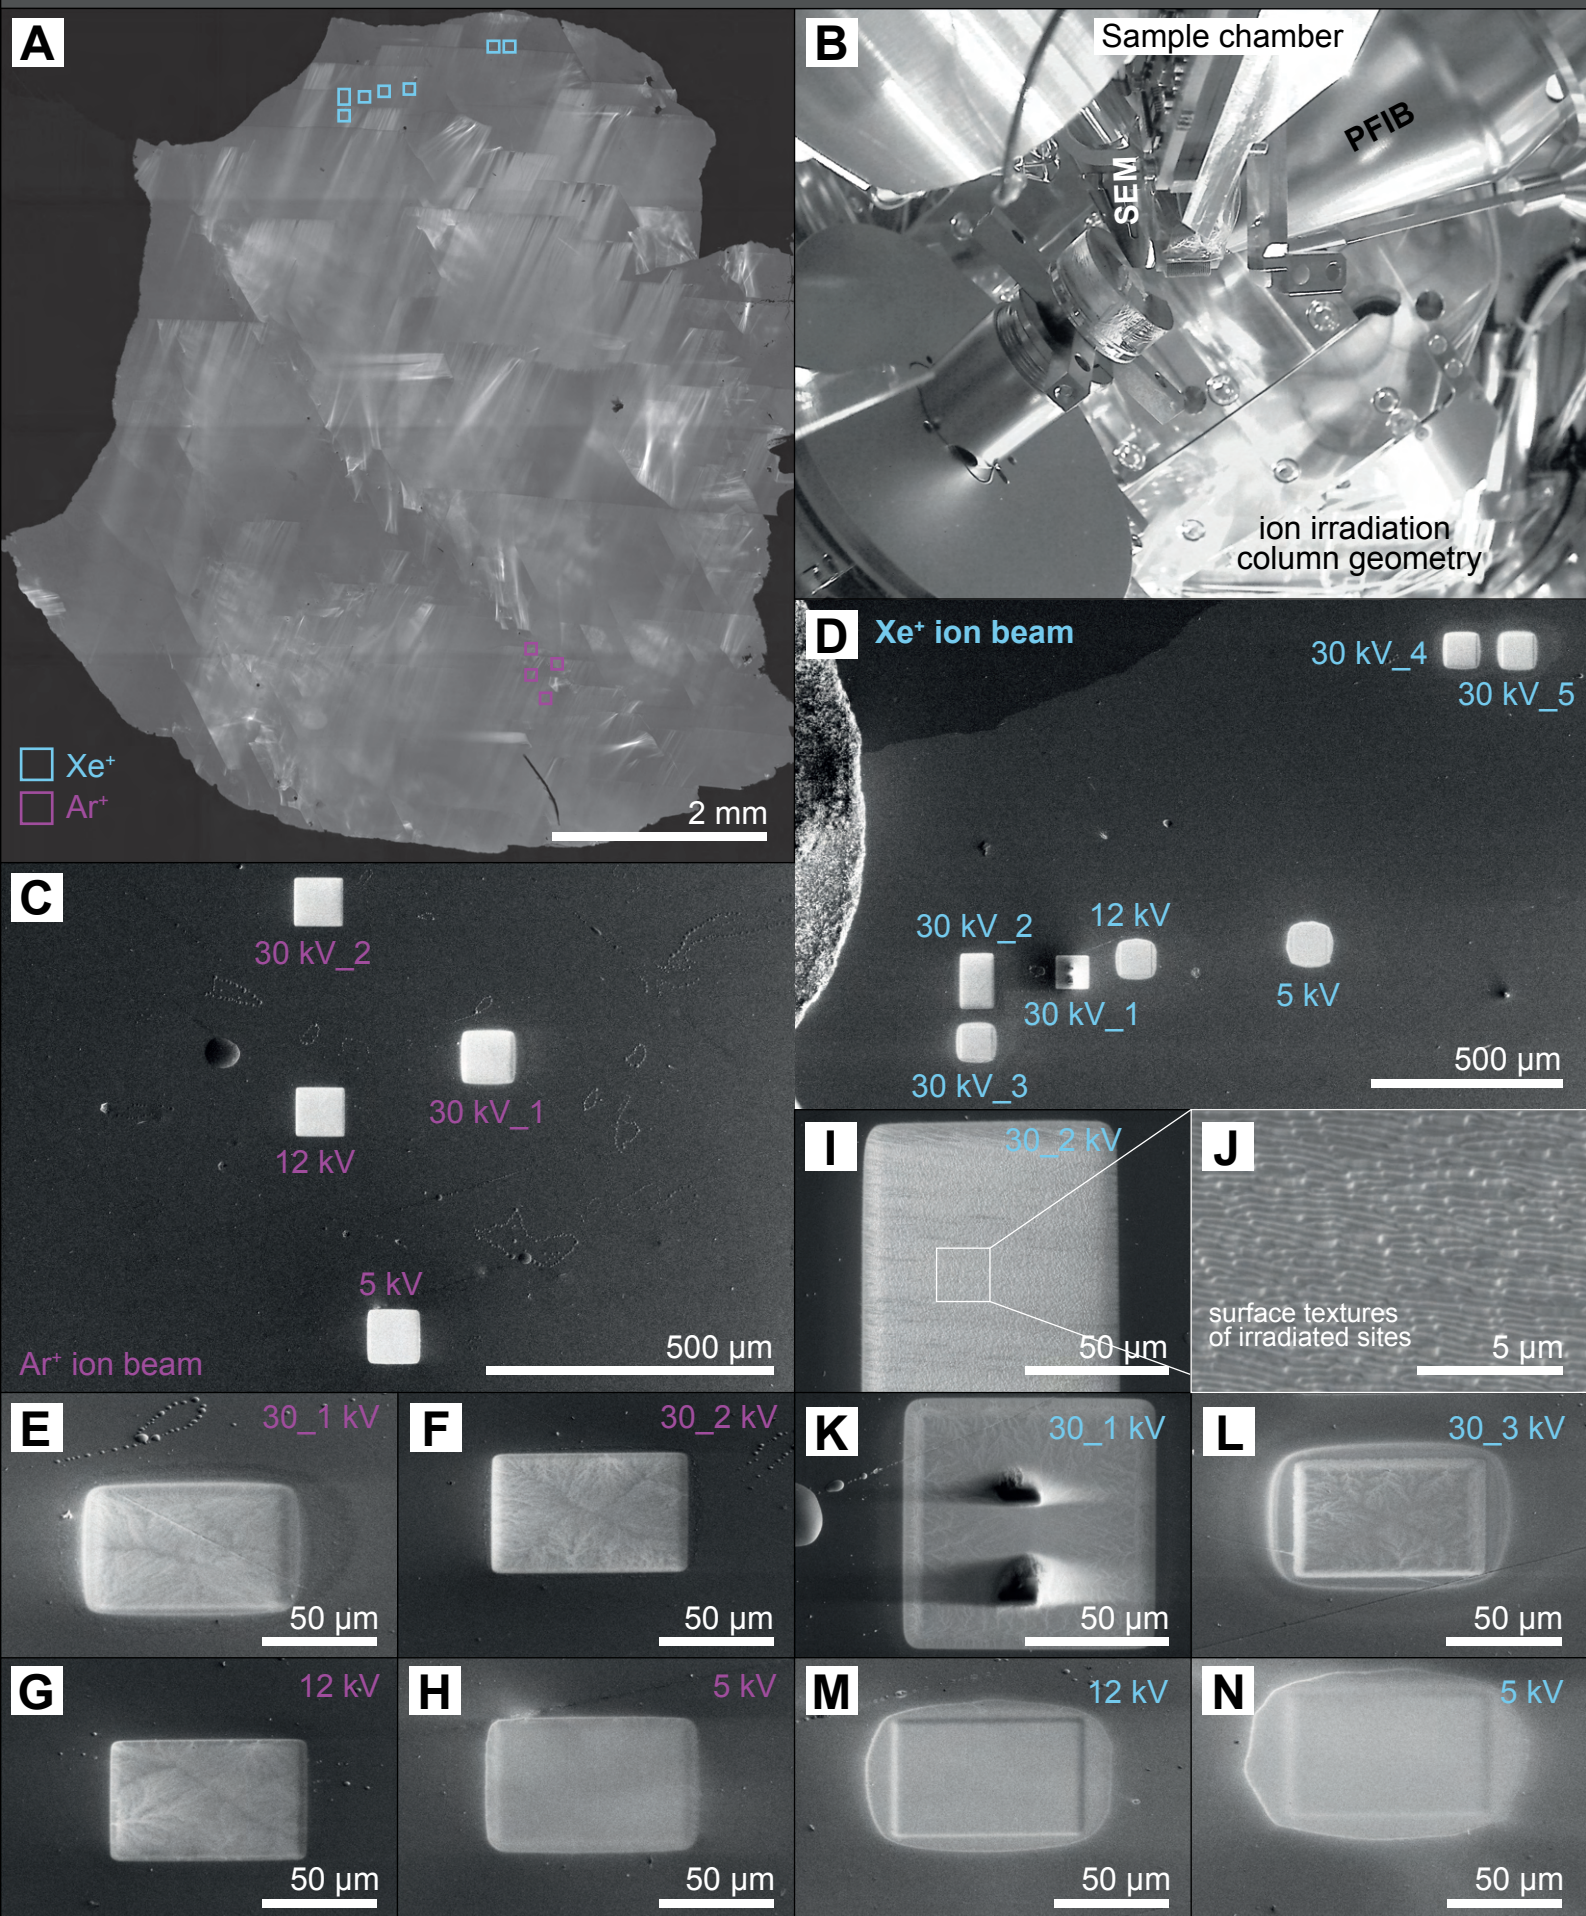

Figure S6: Xe<sup>+</sup>/Ar<sup>+</sup> irradiation experiments at different voltages (30–5 kV) on Hydra PFIB. (A) Cathodoluminescence texture of the Mud Tank zircon used for the irradiation experiments. (B) PFIB column geometry during ion machining. (C–N) Sites on Mud Tank zircon irradiated at different ion beam voltages.



# Fs Laser Edge Irradiation Experiment – Helios 5 Laser Hydra UX

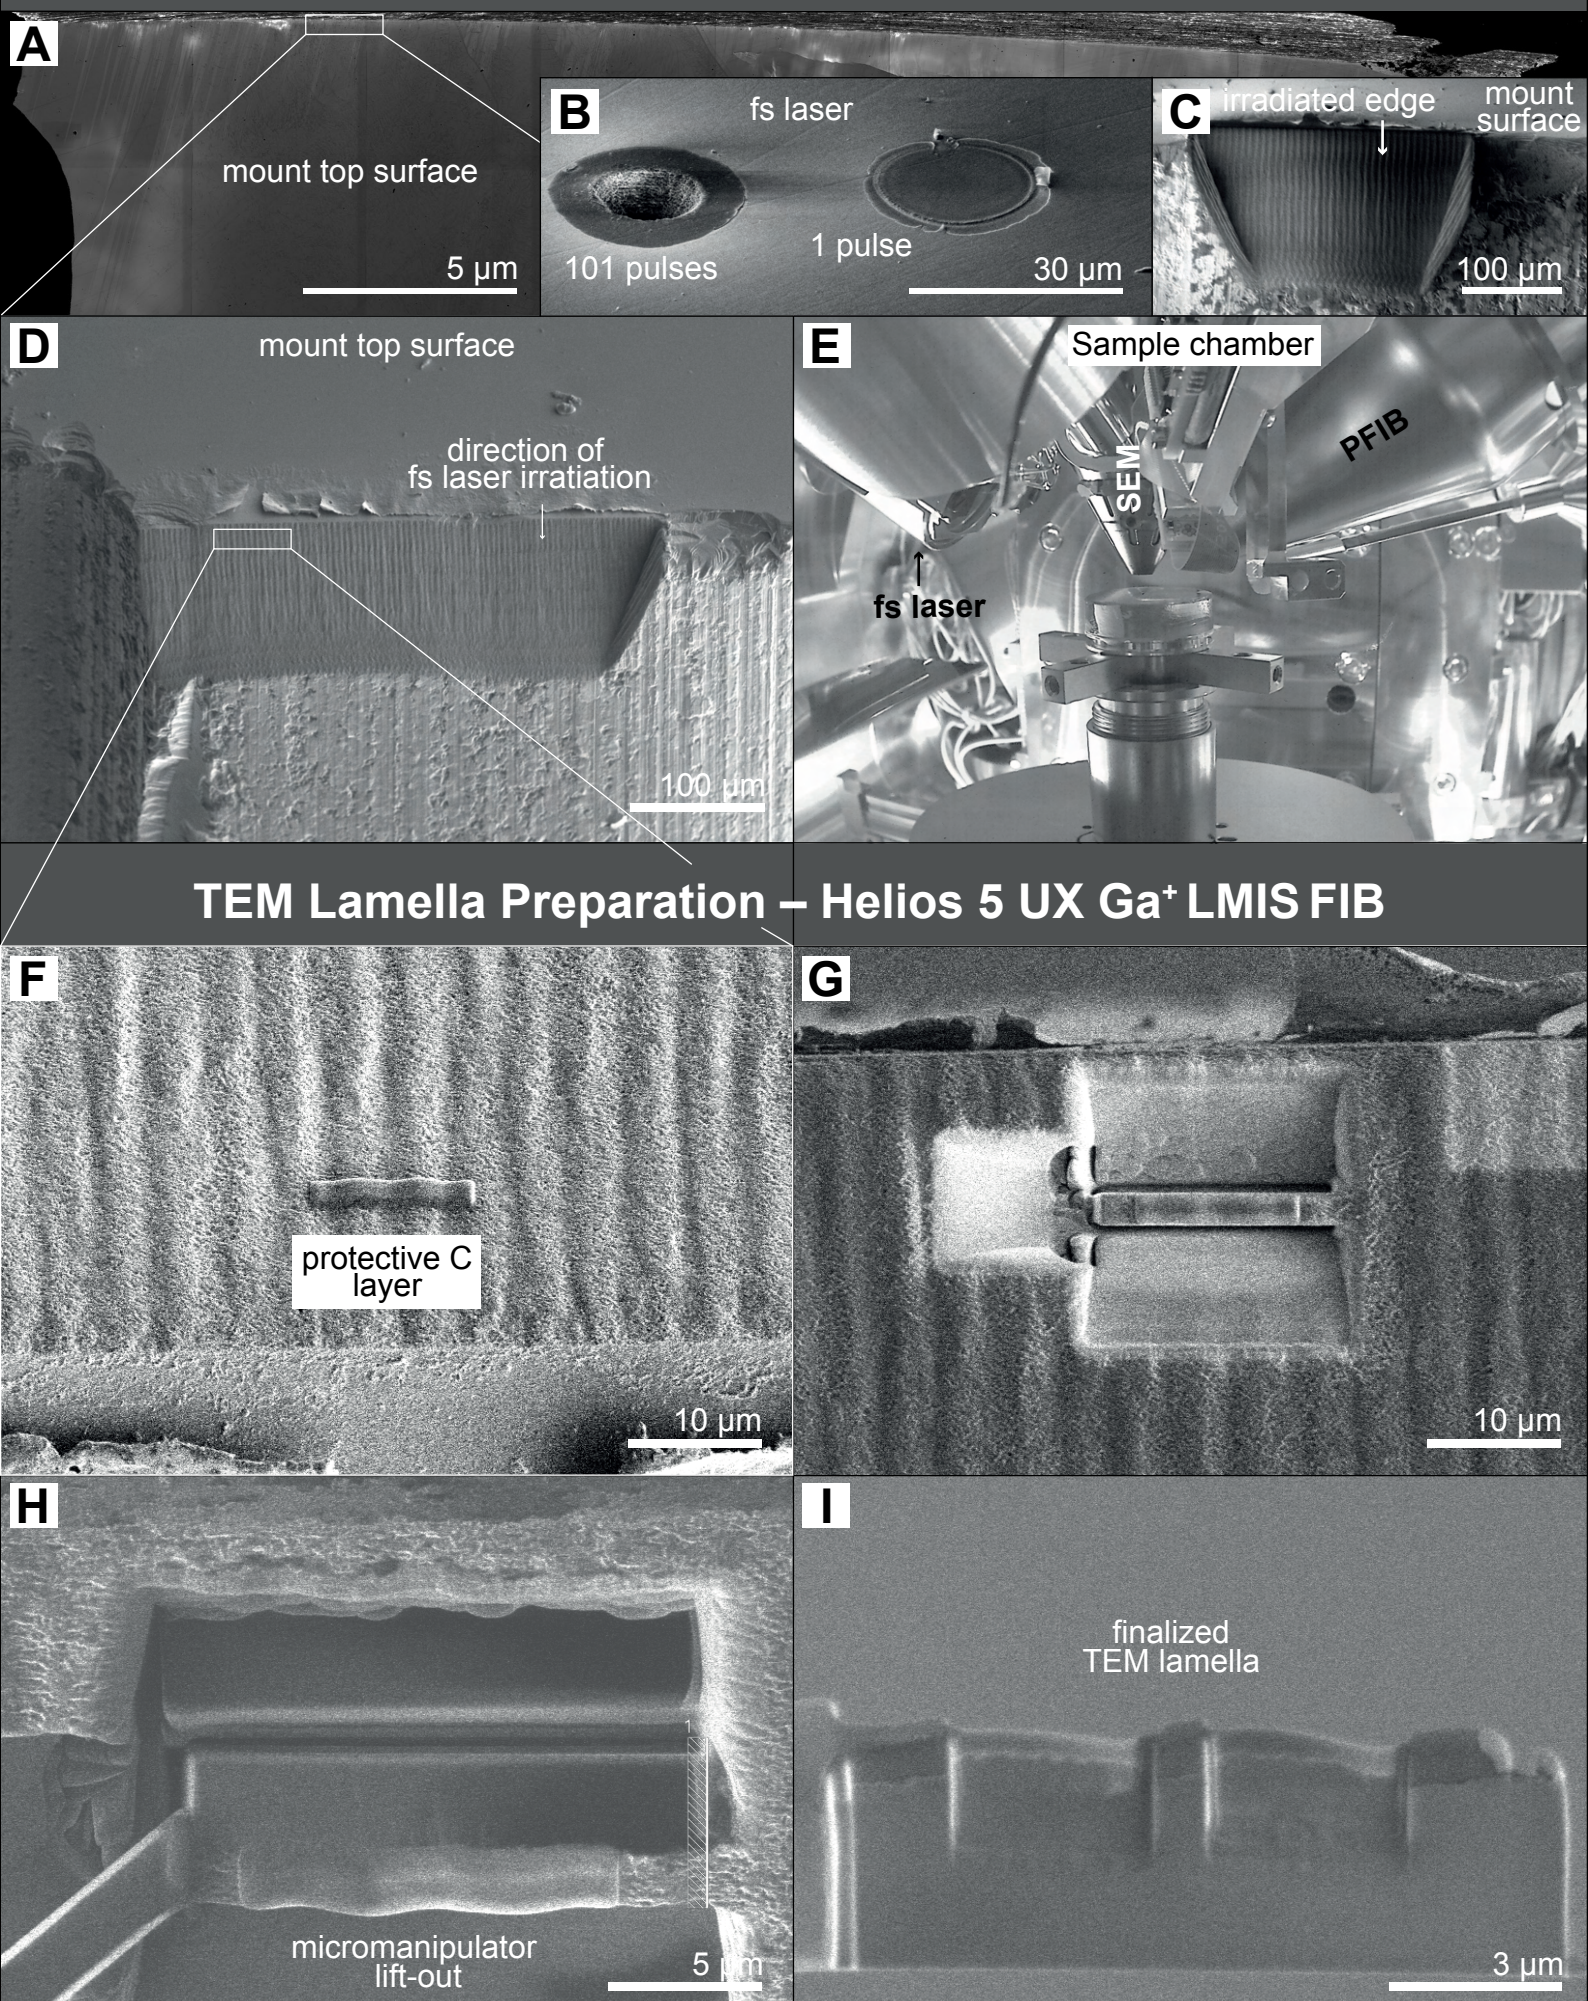

Figure S7: Femtosecond laser (515 nm wavelength) irradiation experiment on an exposed edge of a Mud Tank zircon. (A) Cathodoluminescence (CL) texture of the irradiated Mud Tank zircon. (B) Surface halo and lack of debris after femtosecond laser machining. (C and D) Curtained surface topography of a laser crater wall. (E) View of the sample chamber showing the main elements. For normal incidence laser irradiation, a pre-tilted holder (60 °) is used to orient the zircon surface at a 90 ° angle with respect to the laser objective (not shown). (F–I) Selected steps of the preparation of a TEM lamella from the irradiated edge. LMIS-liquid metal ion source.



# TEM Lamella from a PFIB Zircon Microsample – Ga<sup>+</sup> LMIS FIB

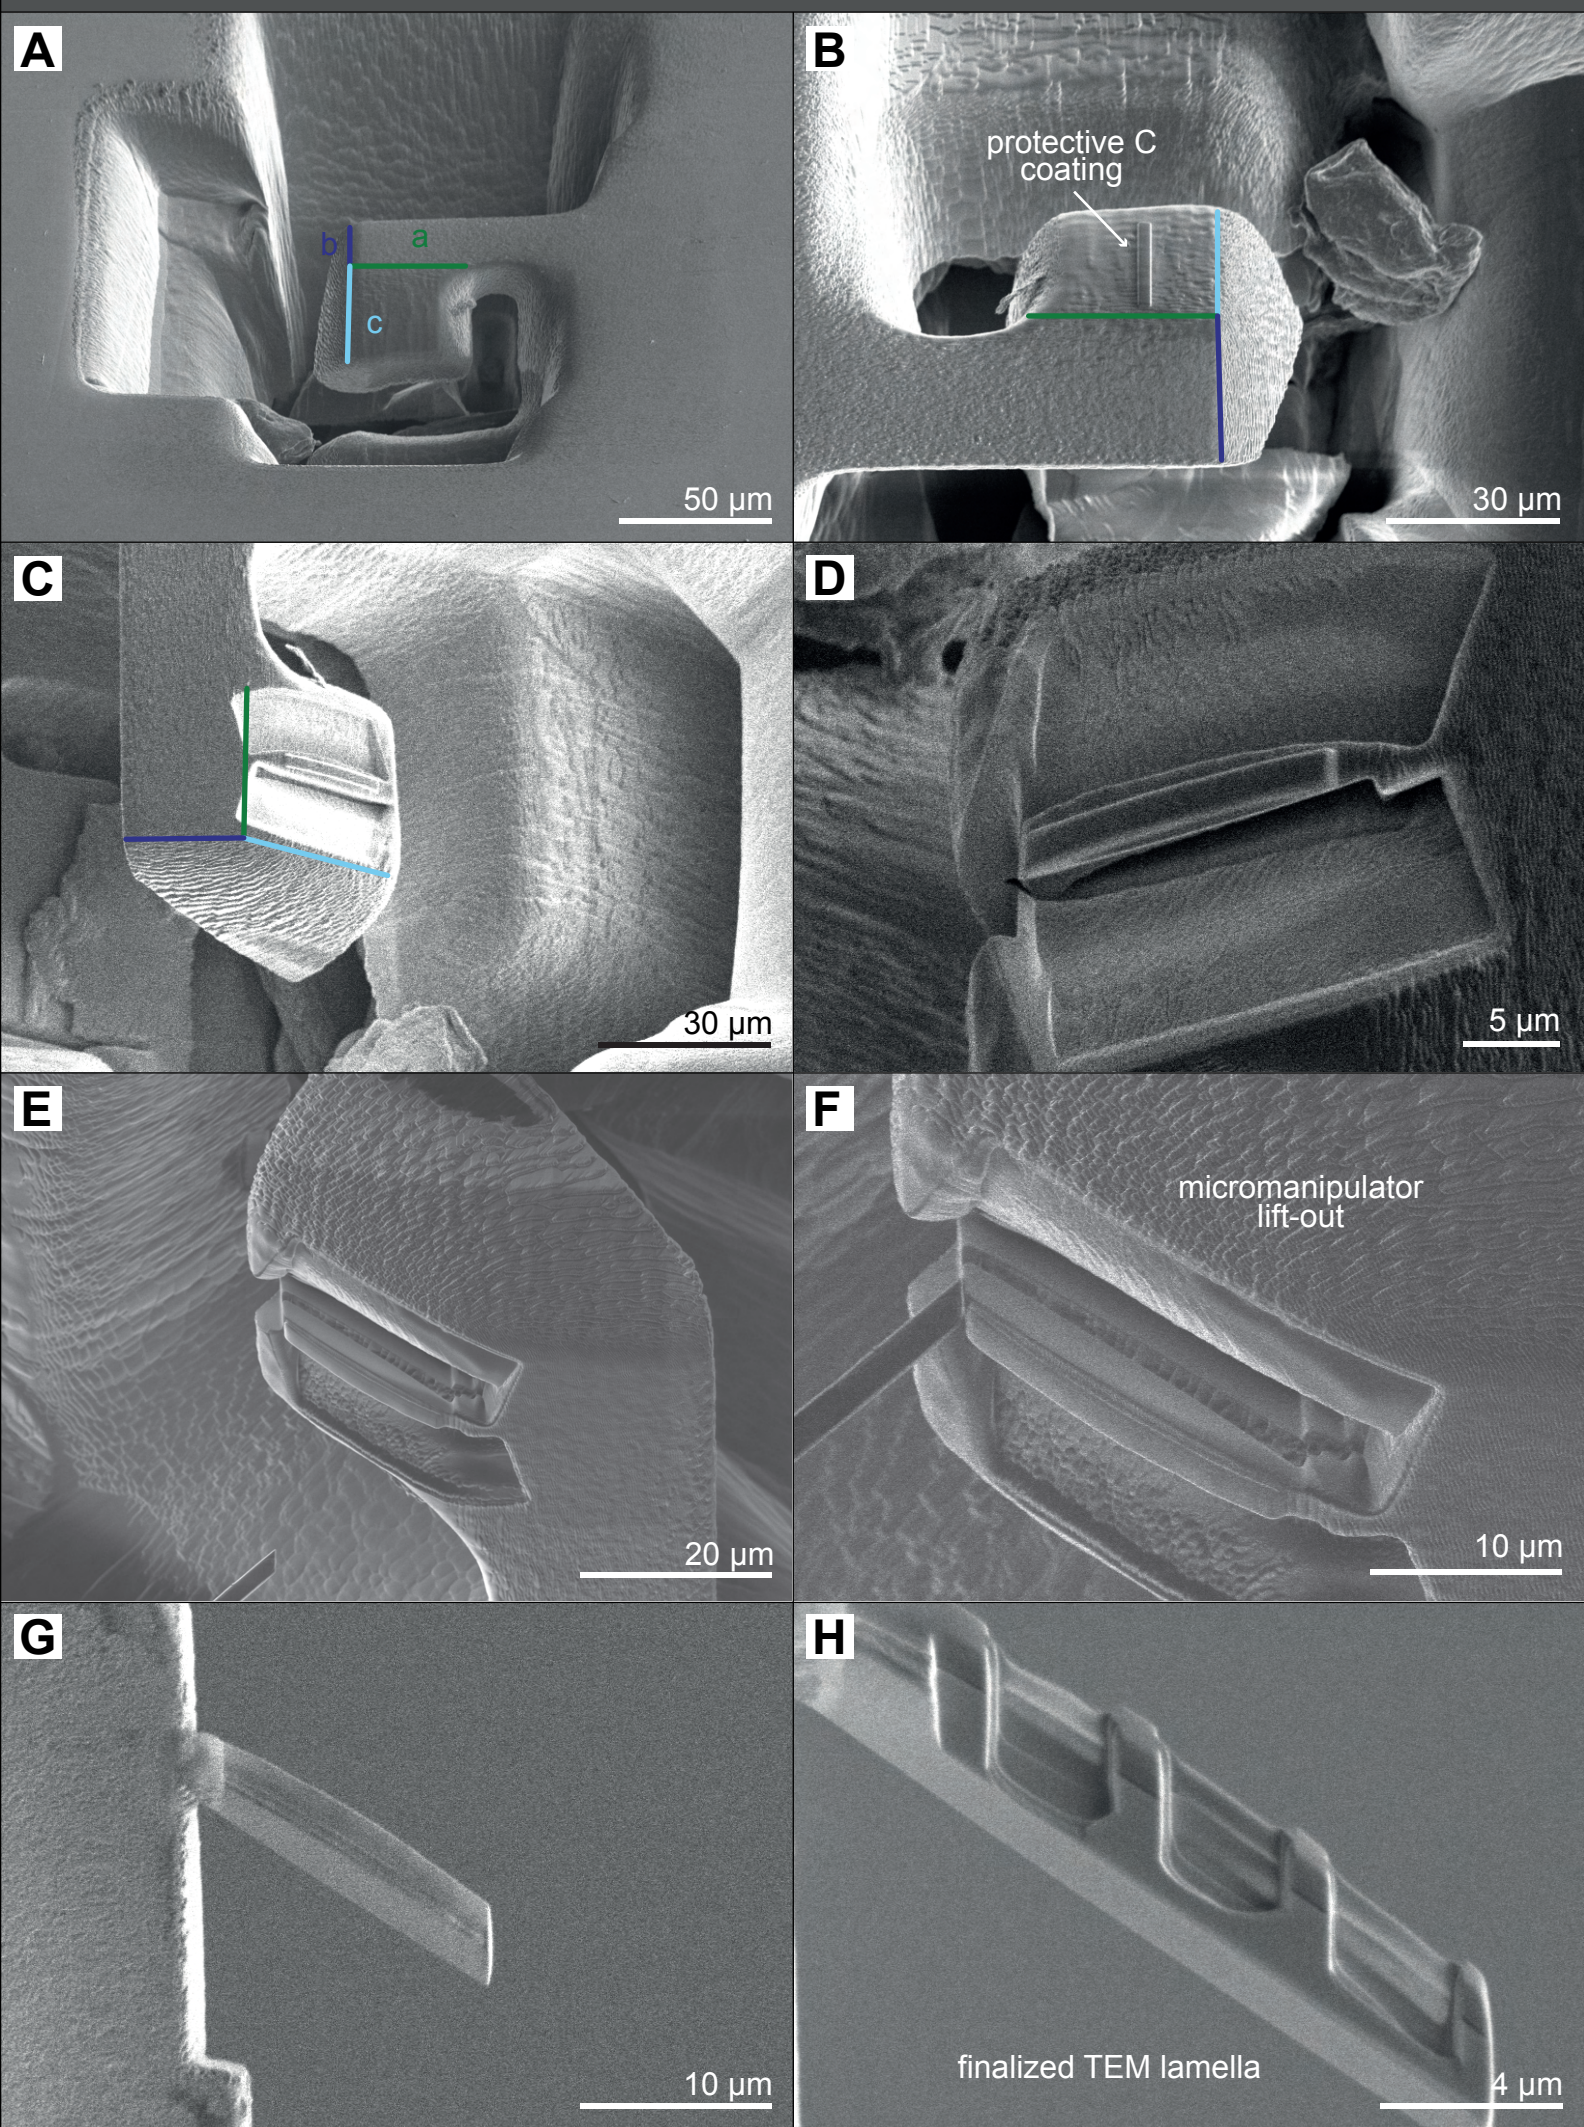

Figure S8: TEM lamella preparation from a Xe<sup>+</sup> PFIB-machined Mud Tank microsample. Marked microsample edges in A–C correlate with those in Figure 6B and C in the main text. LMIS-liquid metal ion source.



# Xe<sup>+</sup> Irradiation Damage – Fera3 PFIB

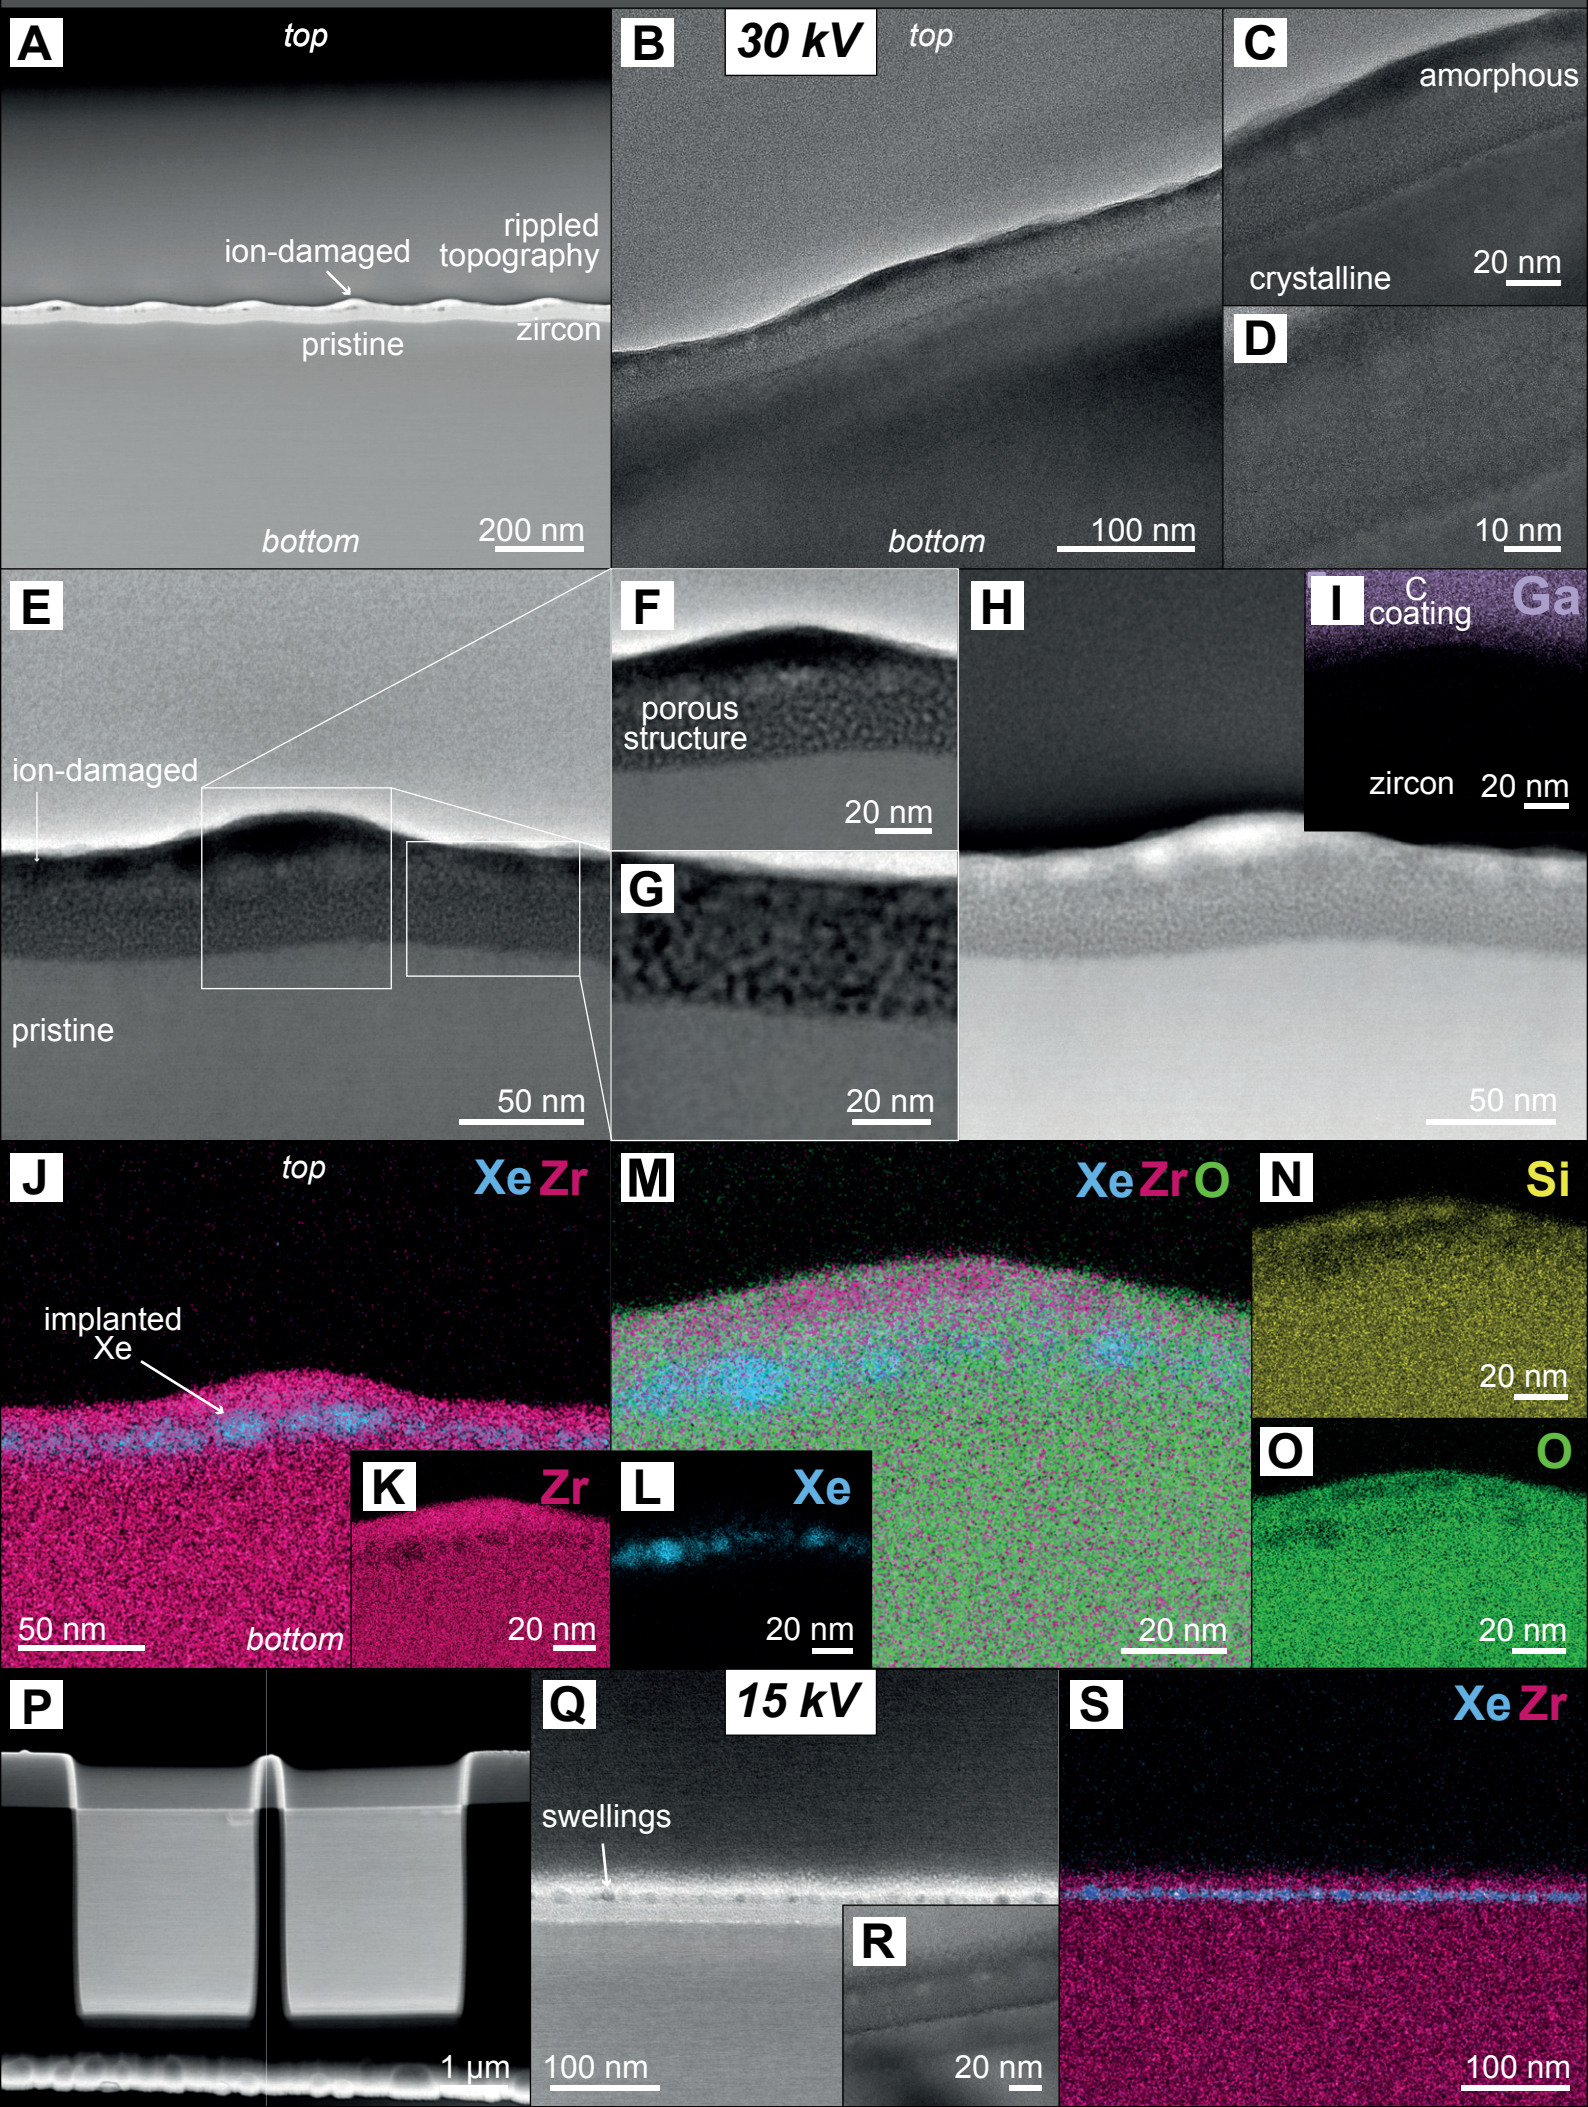



# Xe<sup>+</sup> Irradiation Damage – Fera3 PFIB

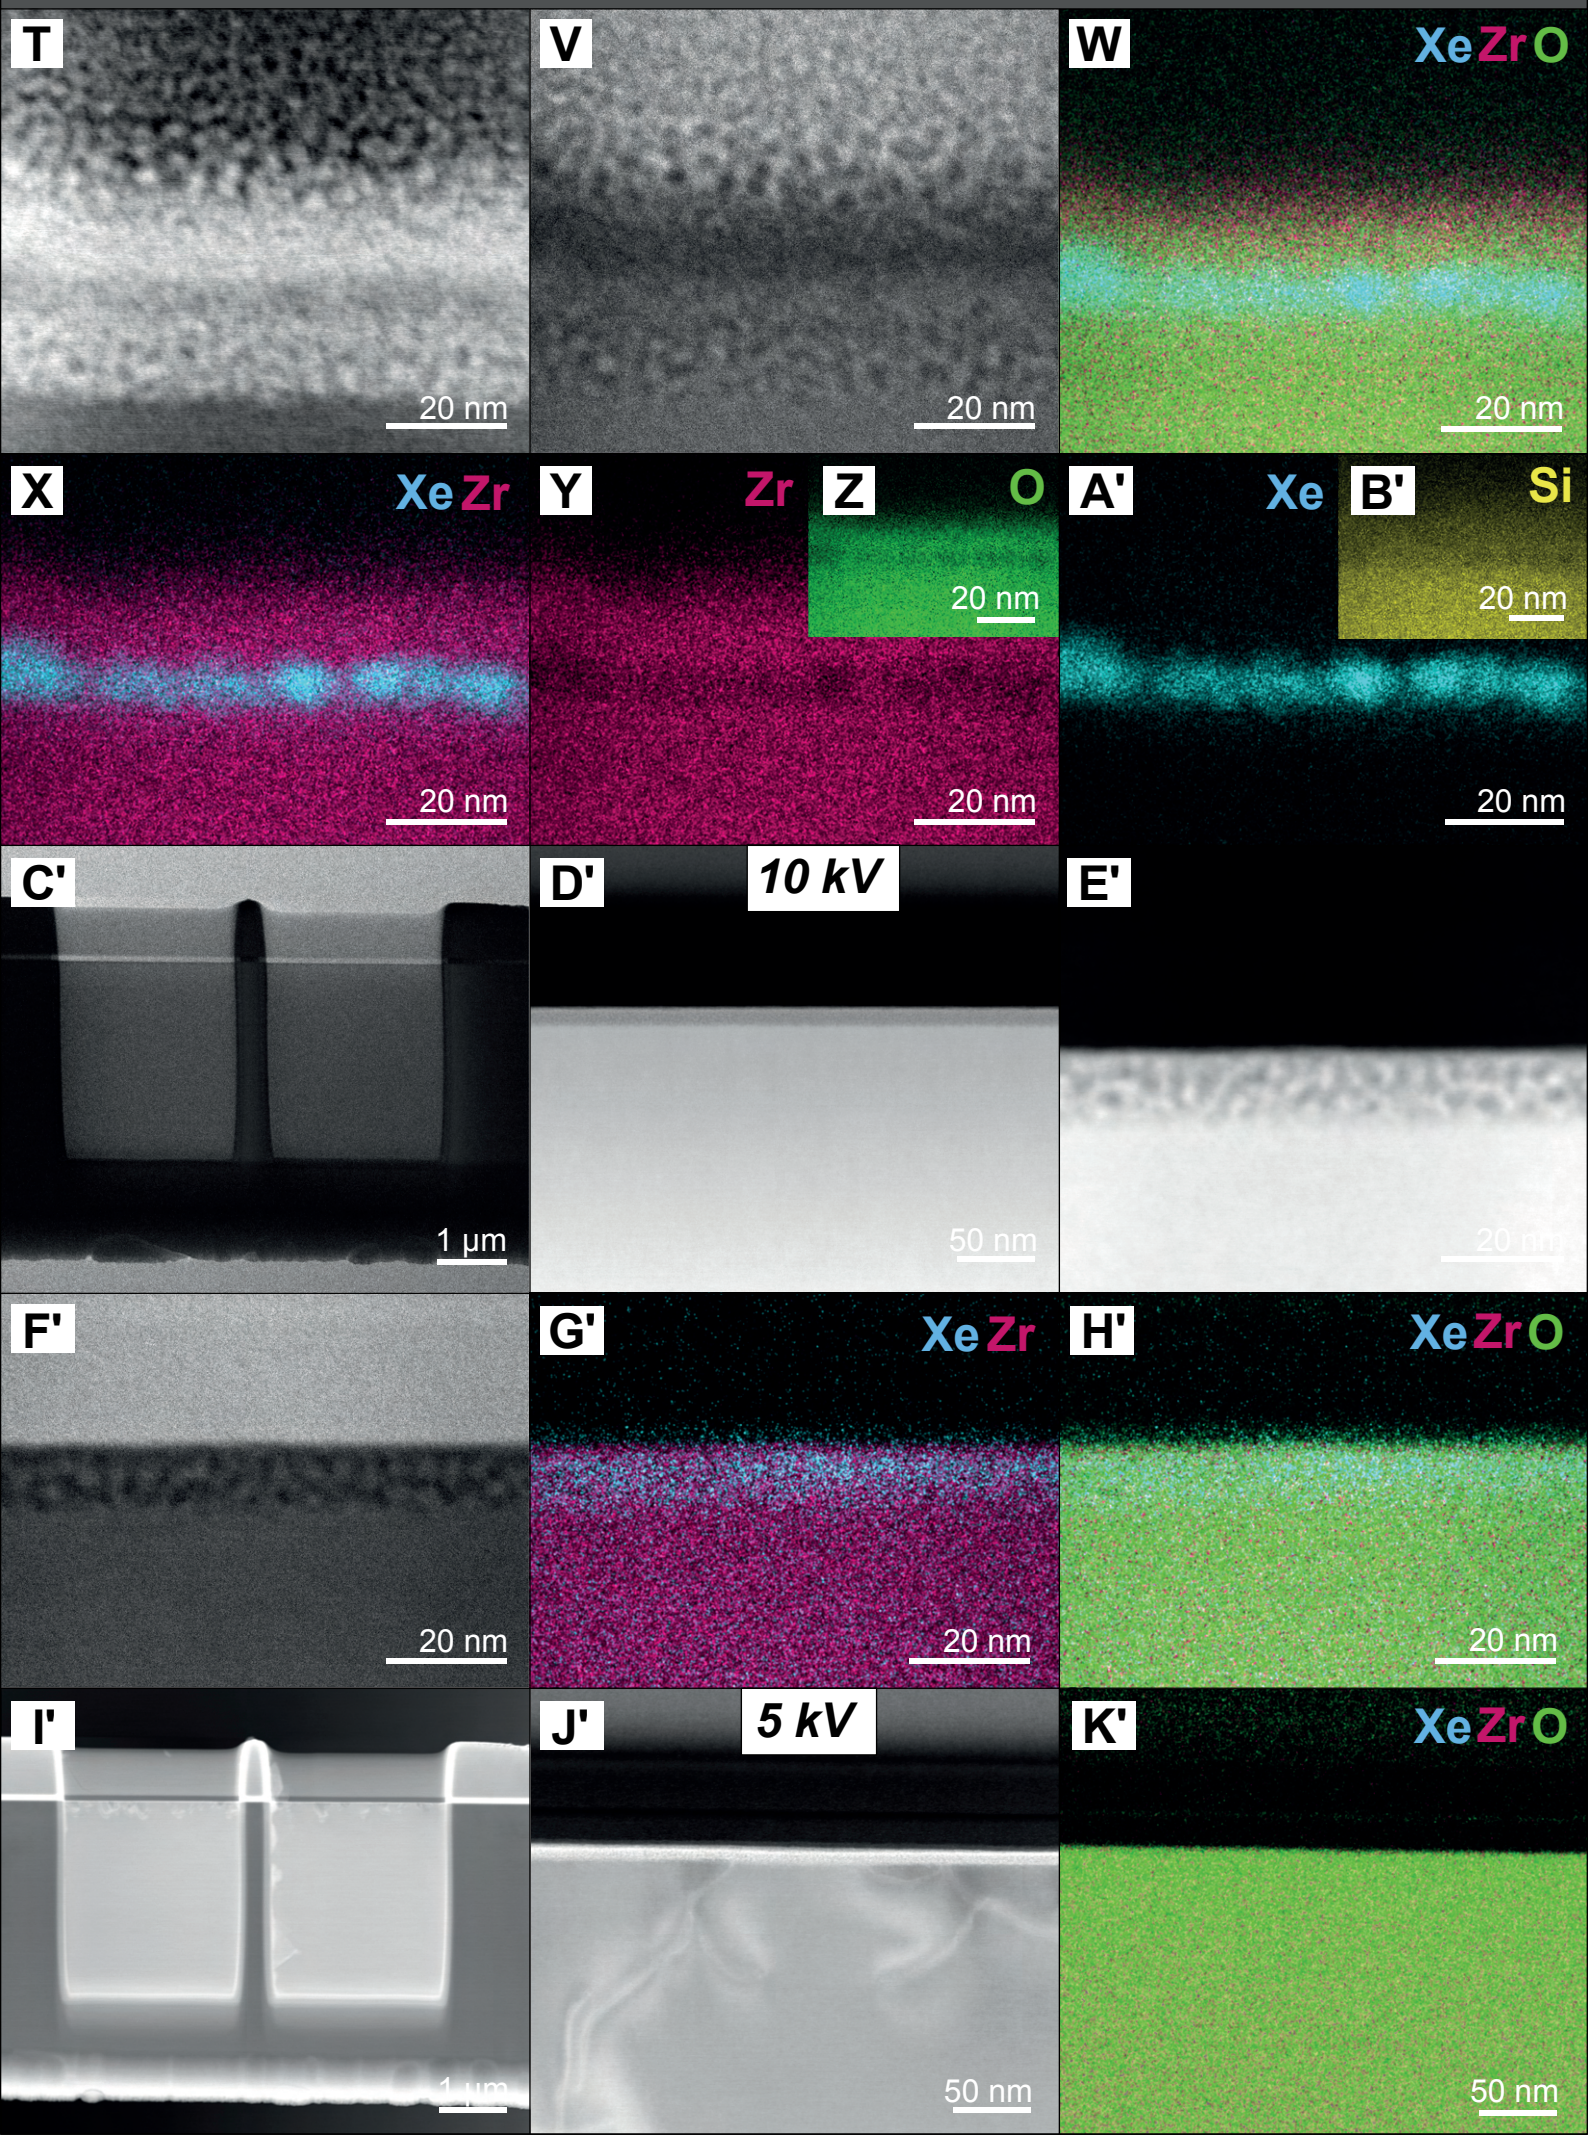



# Xe<sup>+</sup> Irradiation Damage – Fera3 PFIB

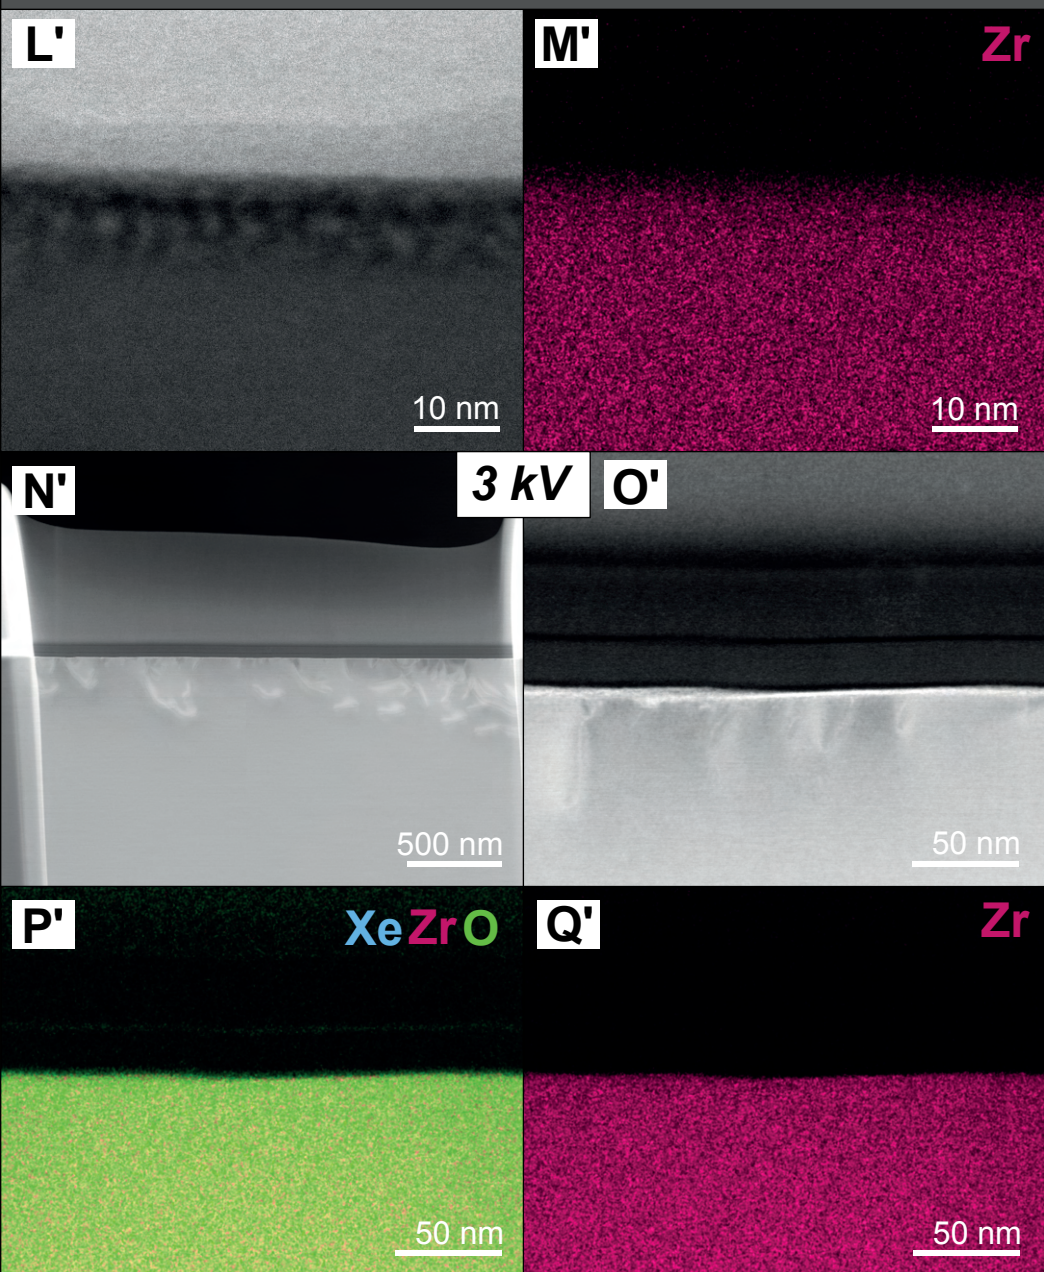

Figure S9: TEM images and EDS element maps of zircon damaged by Xe<sup>+</sup> irradiation at different voltages (30–3 kV) on Fera3 PFIB. The damaged zone is nanometers-thick, porous and amorphous, and exhibits a rippled surface for high voltage (30 kV and 15 kV) conditions. Element maps show implantation of Xe<sup>+</sup> in continuous layers within the damaged zone and local mobility of Zr, Si and O. Ga element map (I) shows no implantation of Ga<sup>+</sup> ions into zircon during TEM lamella preparation.



# Xe<sup>+</sup> Irradiation Damage – Helios 5 Laser Hydra UX

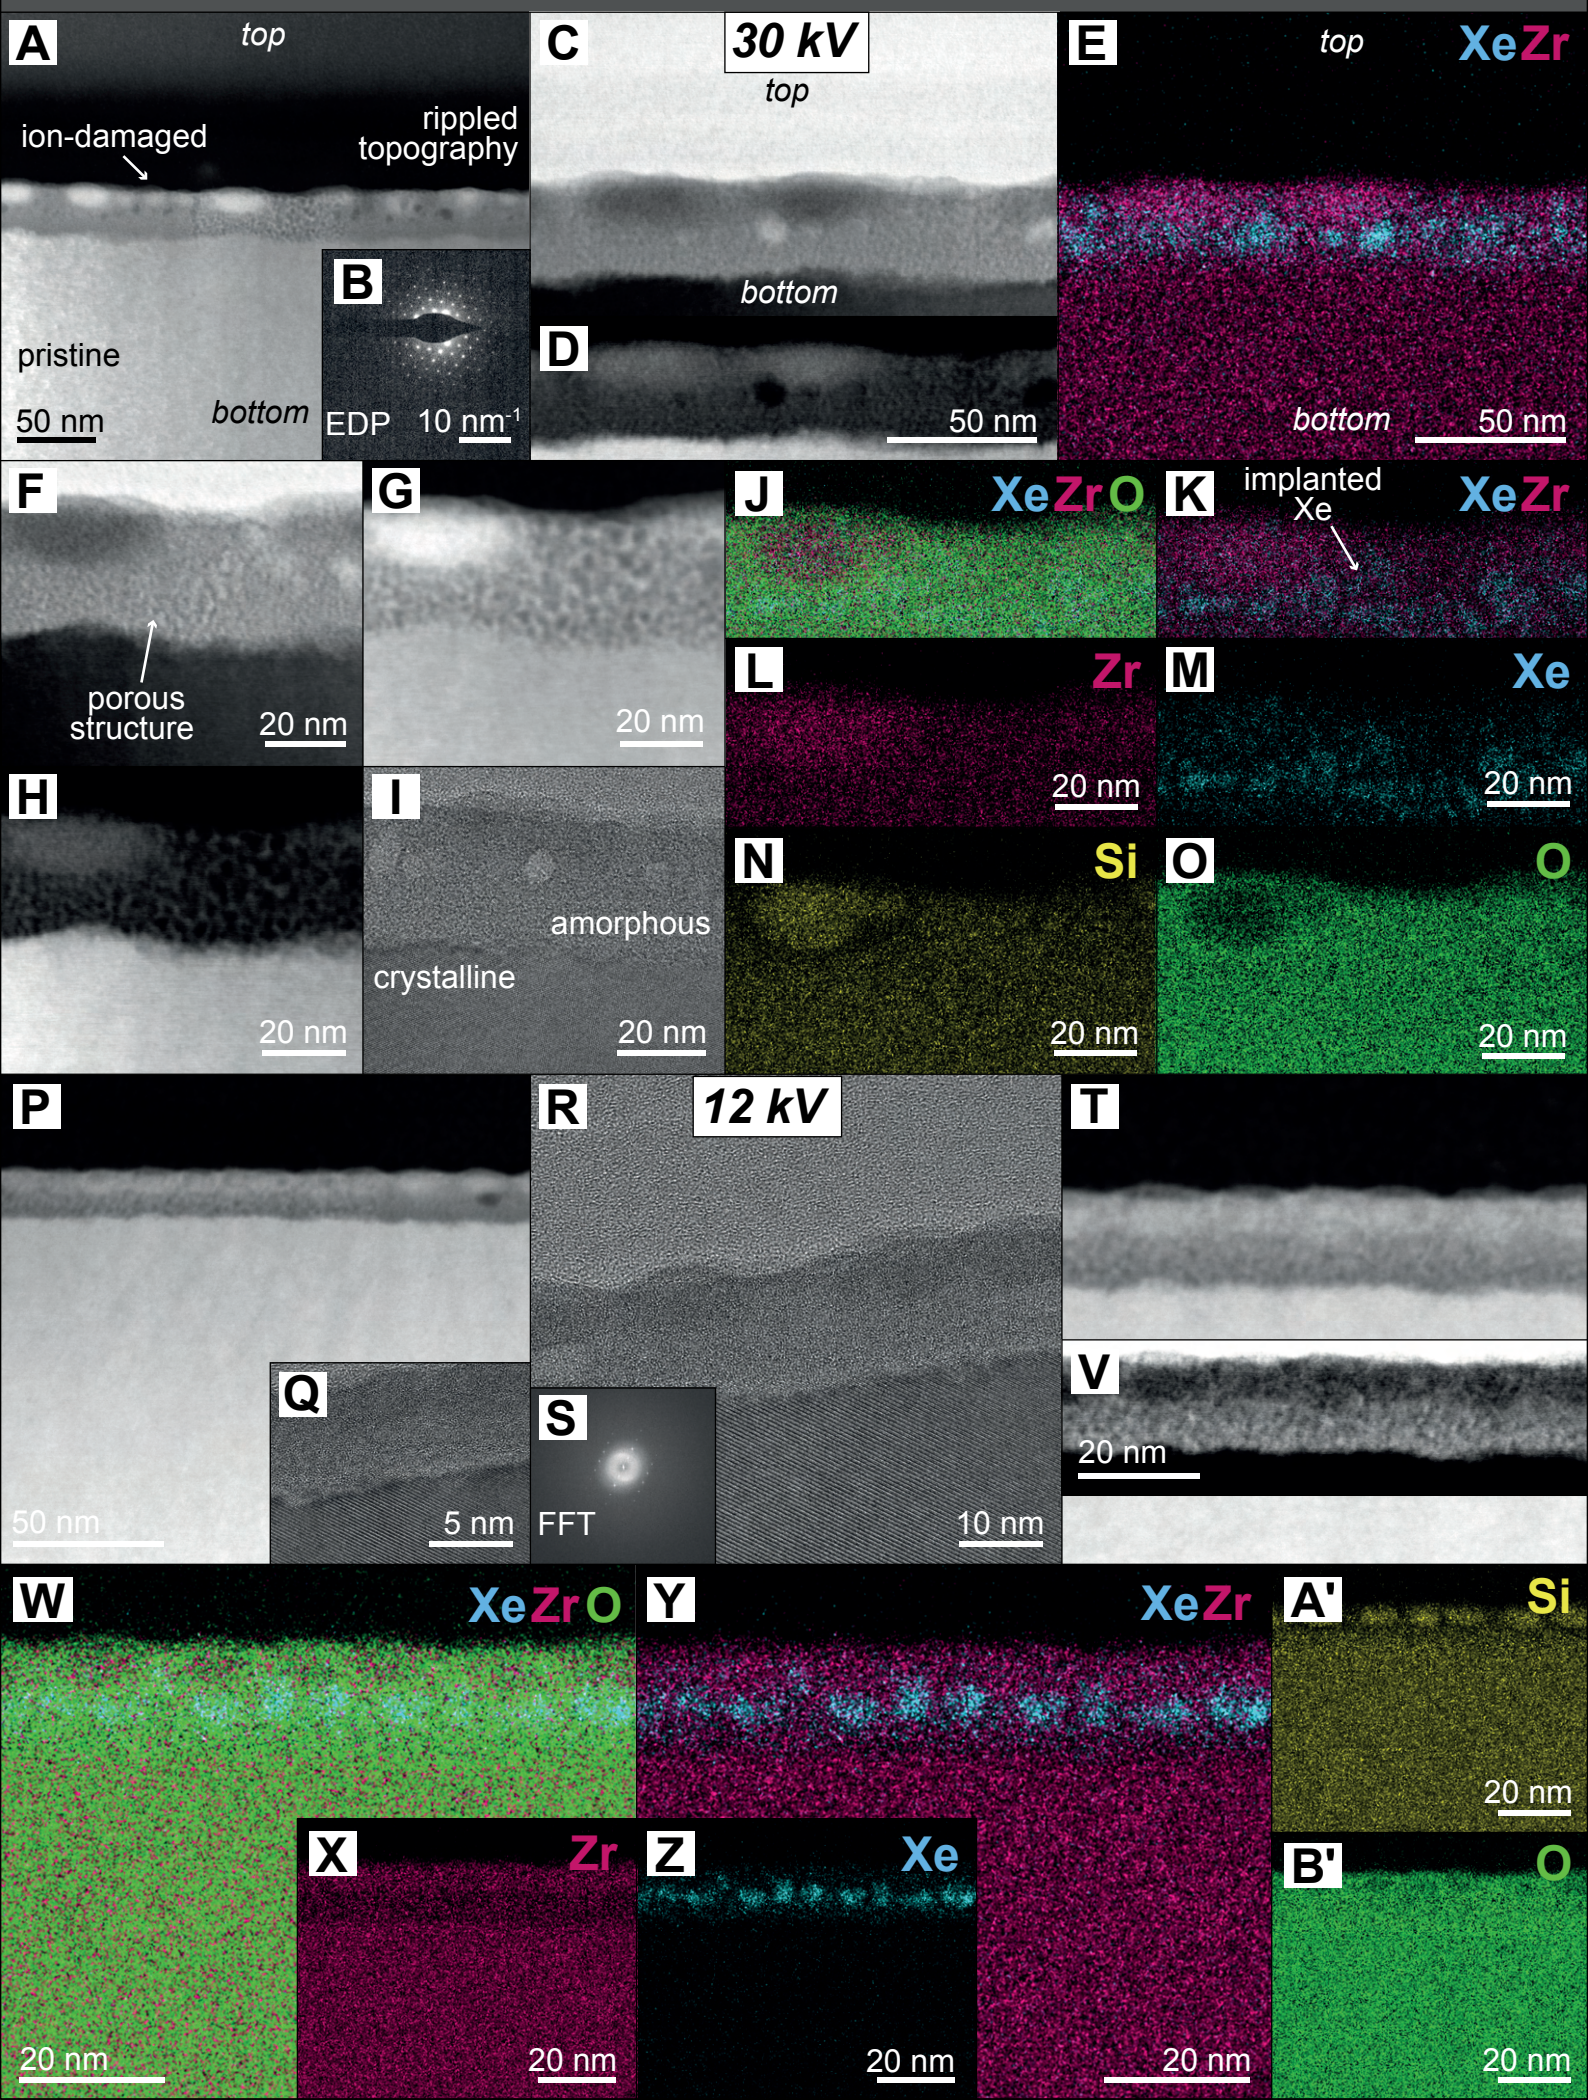



# Xe<sup>+</sup> Irradiation Damage – Helios 5 Laser Hydra UX

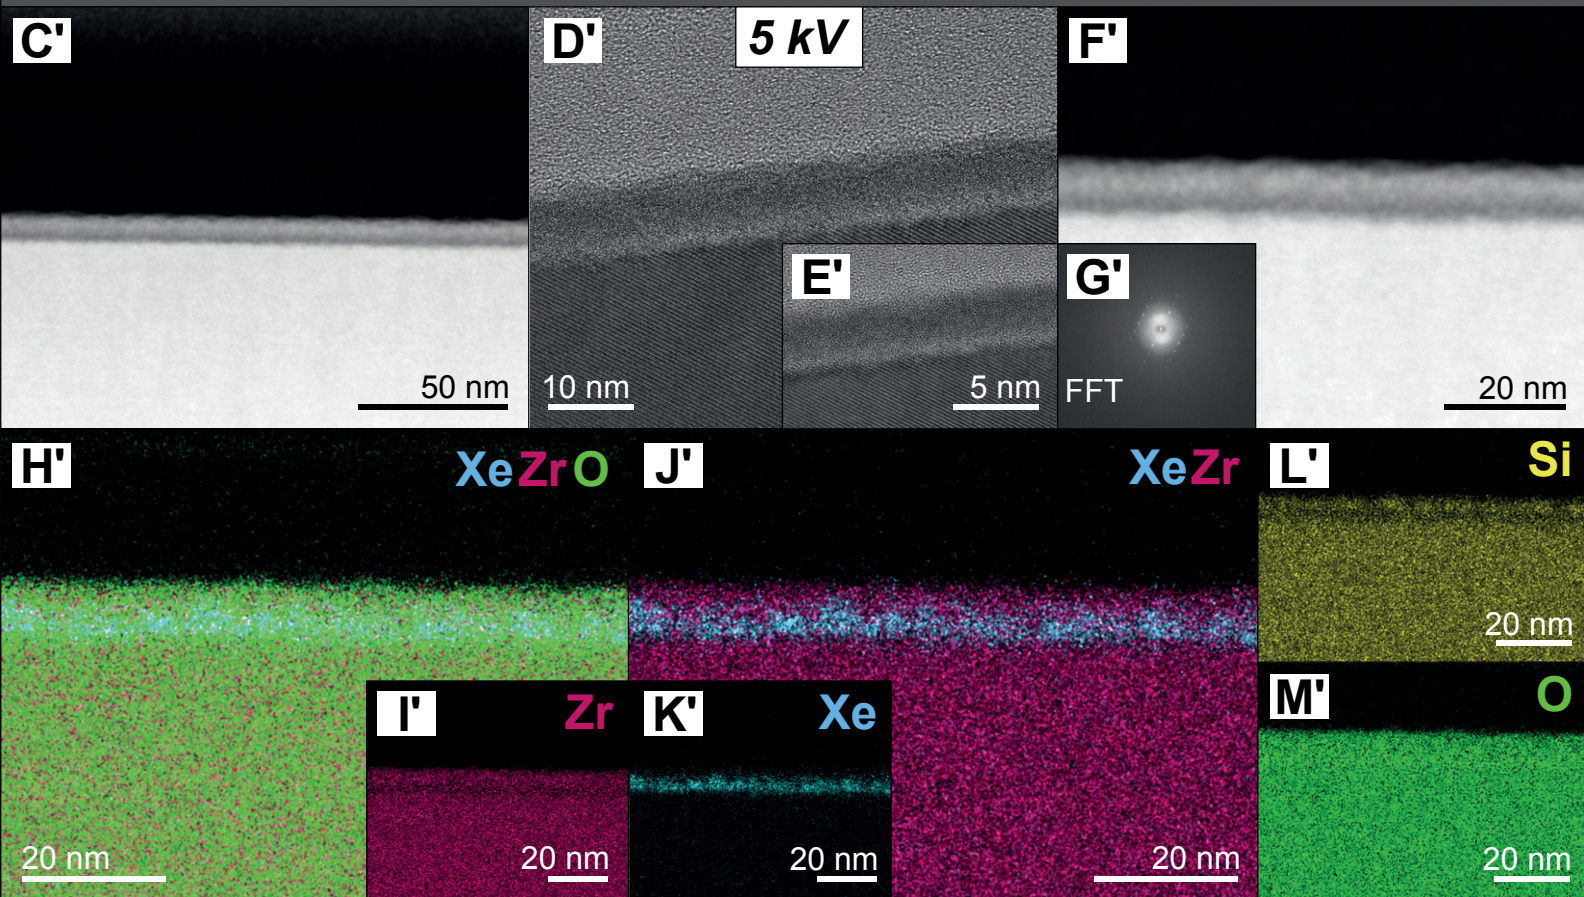

Figure S10: TEM images and EDS element maps of zircon damaged by Xe<sup>+</sup> irradiation at different voltages (30–5 kV) on Hydra PFIB. Electron diffraction (EDP) and fast Fourier transformation (FFT) patterns show a dominantly crystalline state of the analyzed TEM lamella from the irradiated zircon.



# Ar<sup>+</sup> Irradiation Damage – Helios 5 Laser Hydra UX

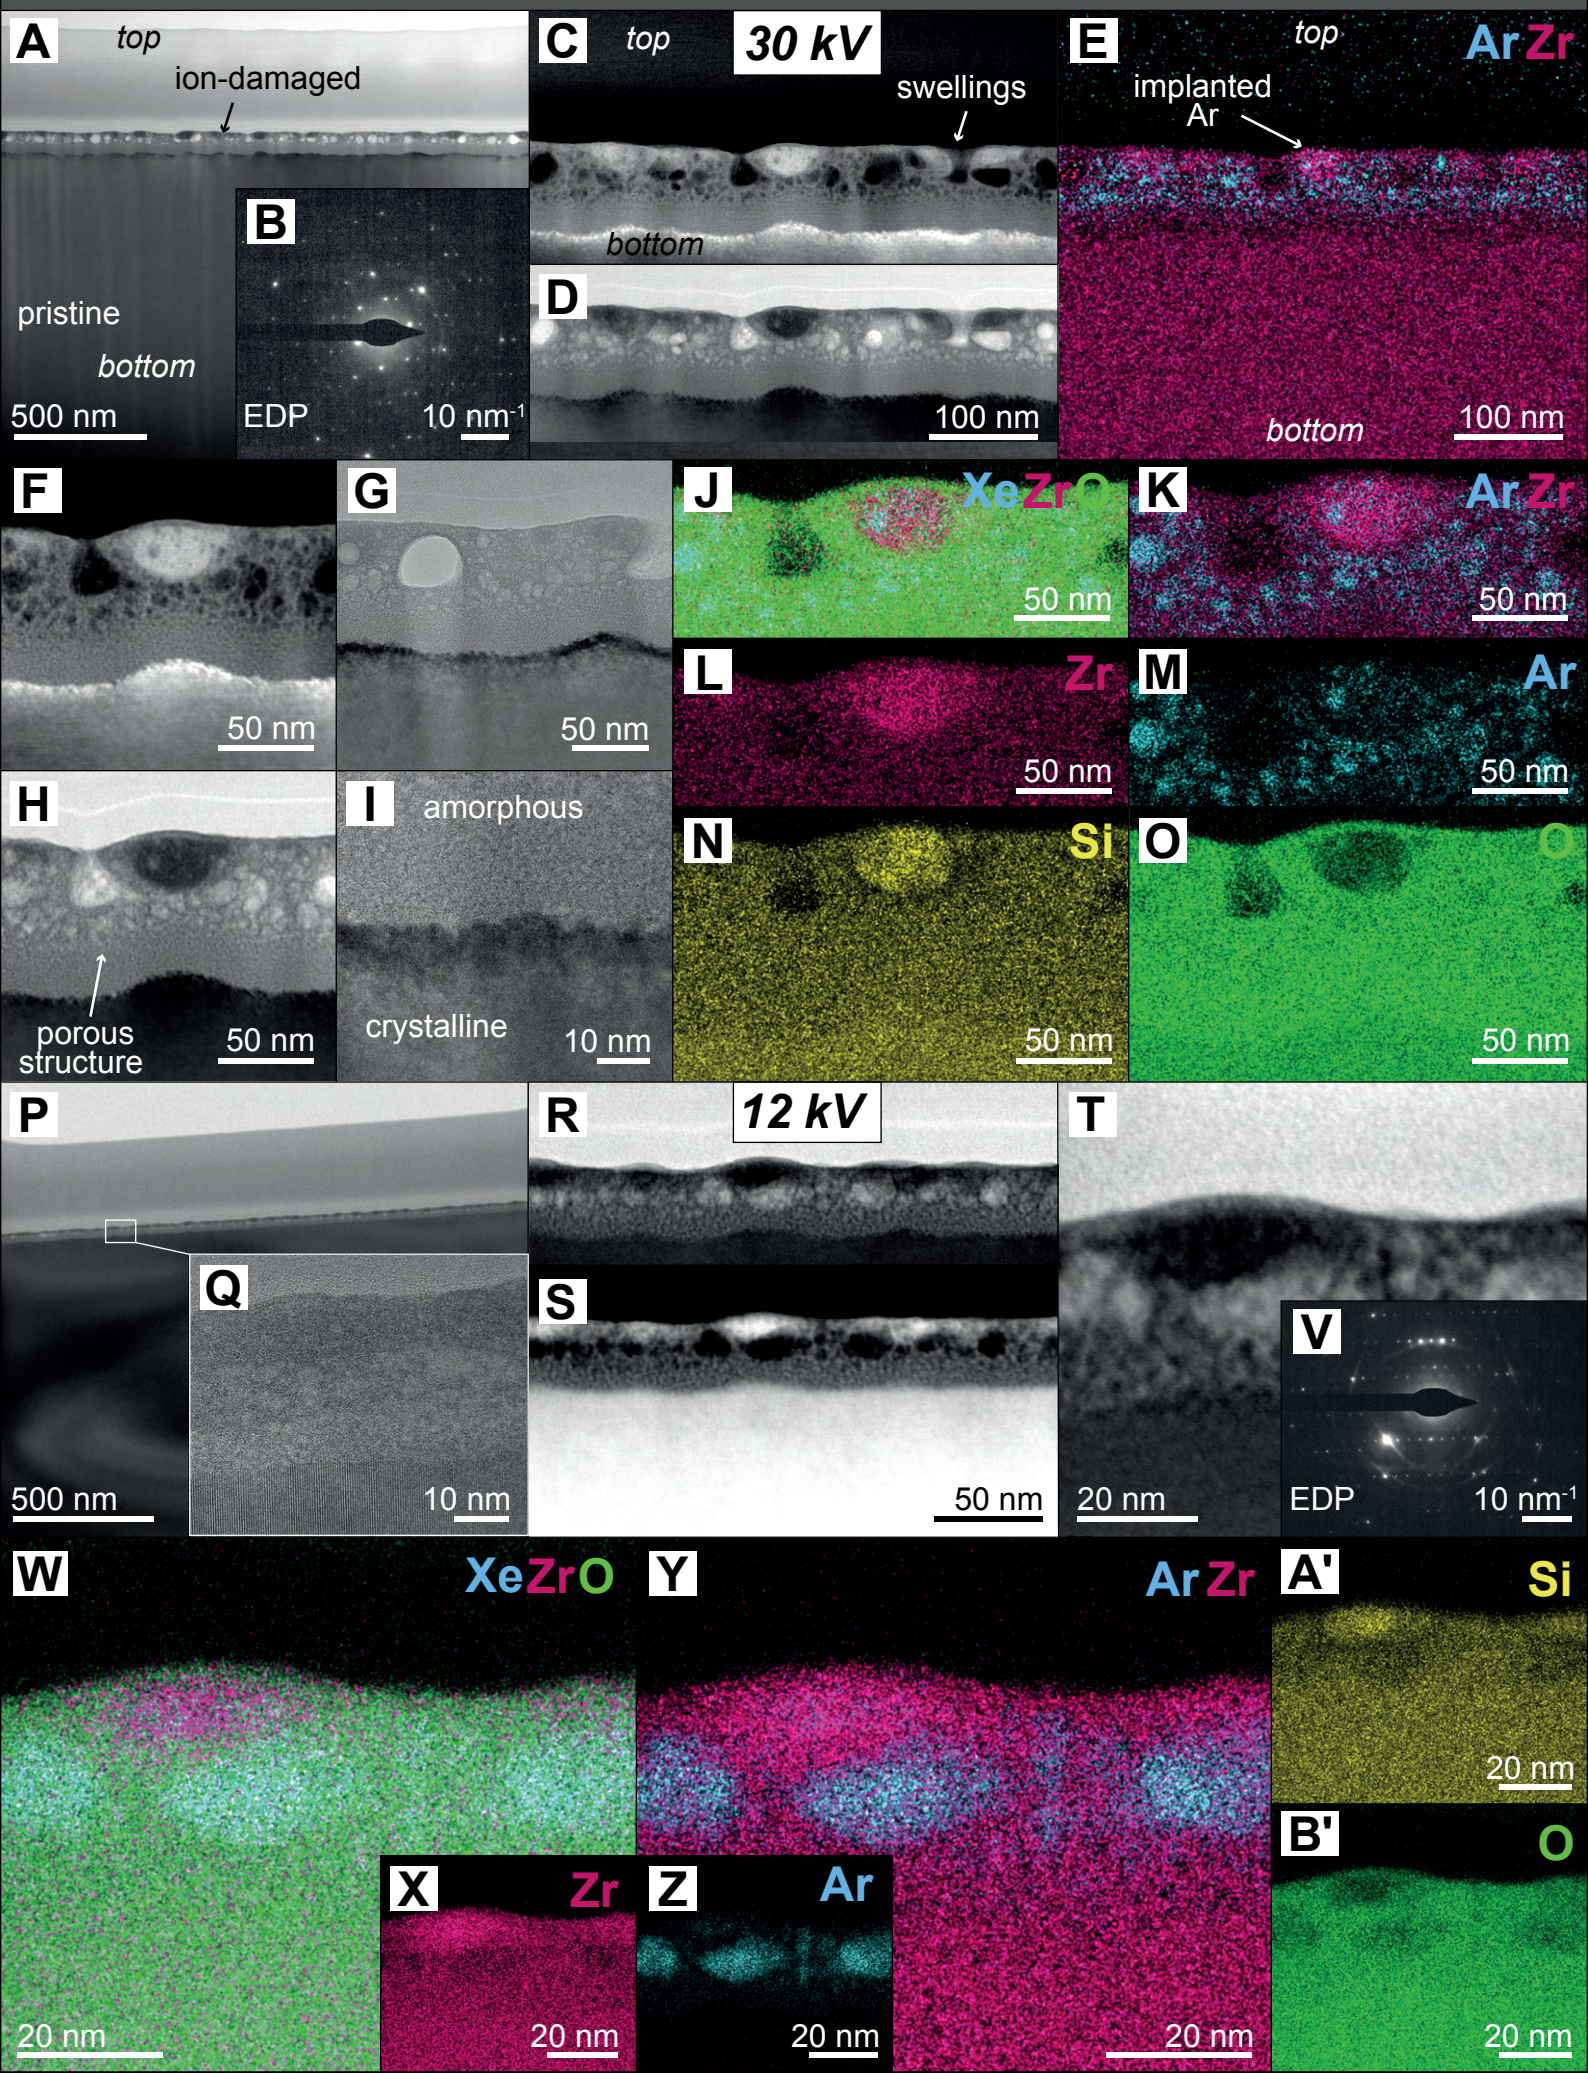



# Ar<sup>+</sup> Irradiation Damage – Helios 5 Laser Hydra UX

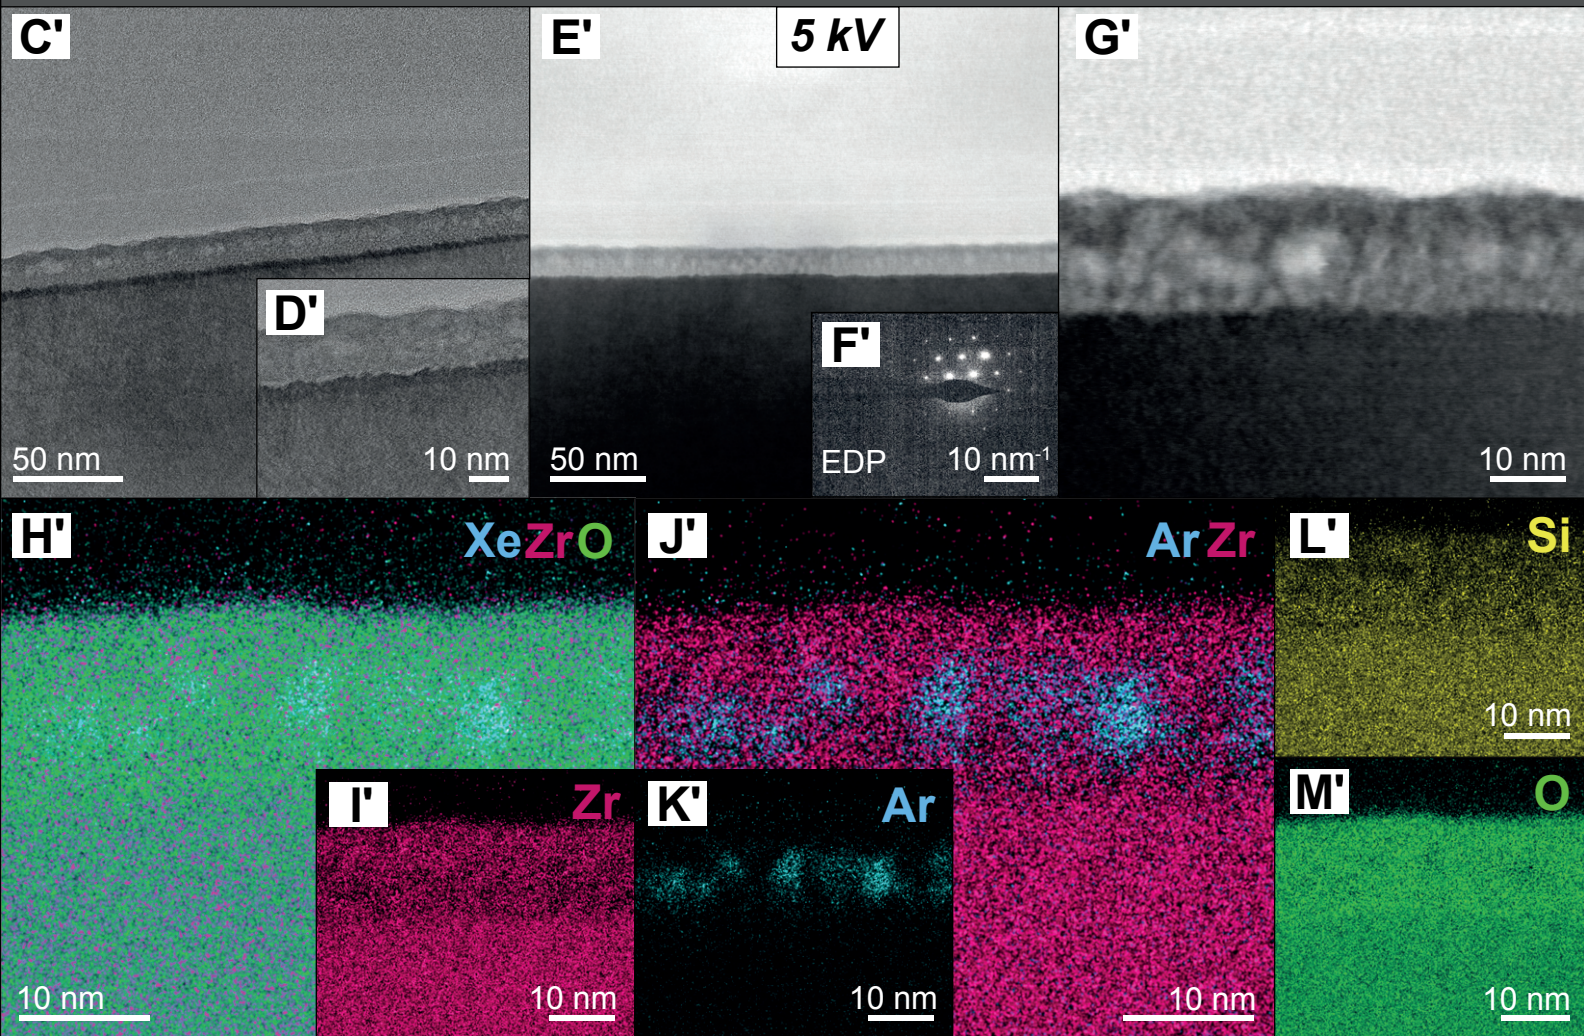

Figure S11: TEM images and EDS element maps of zircon damaged by Ar<sup>+</sup> irradiation at different voltages (30–5 kV) on Hydra PFIB. Electron diffraction (EDP) patterns show a dominantly crystalline state of the analyzed TEM lamella from the irradiated zircon.



# Fs Laser Irradiation Damage – Helios 5 Laser Hydra UX

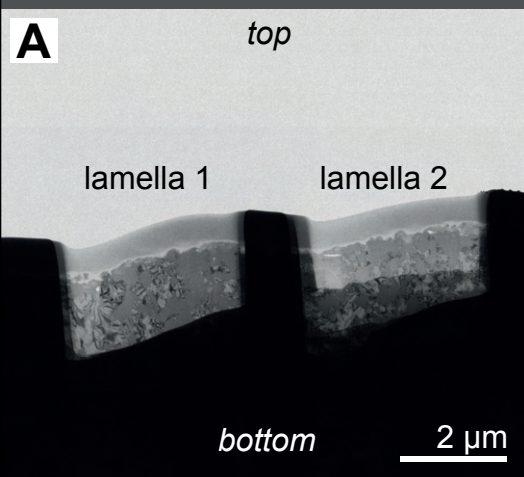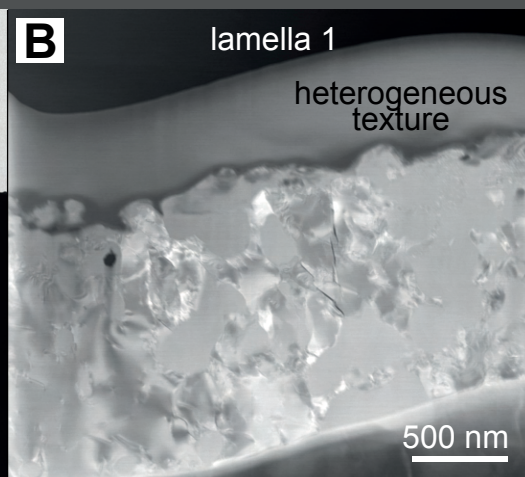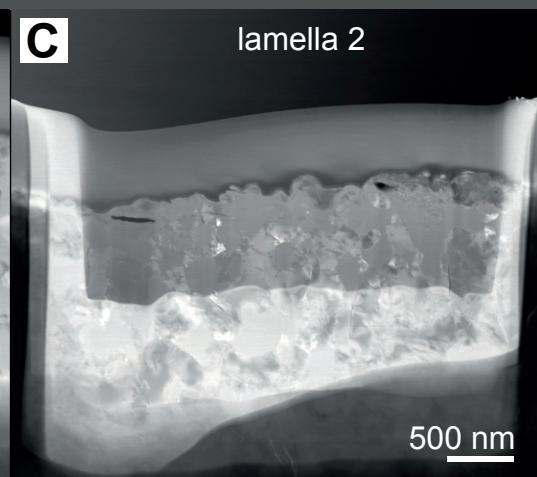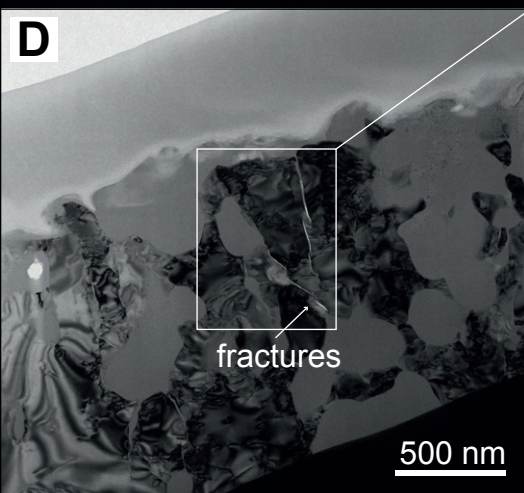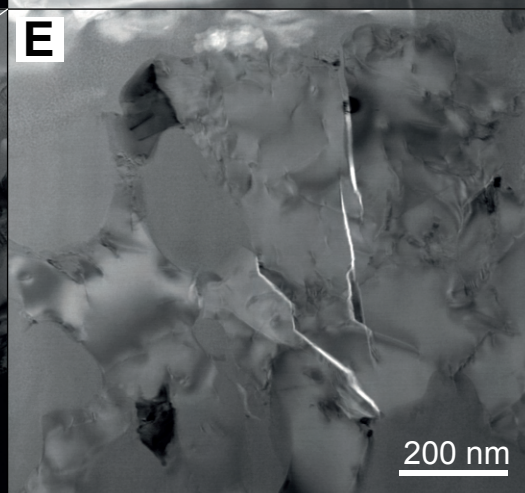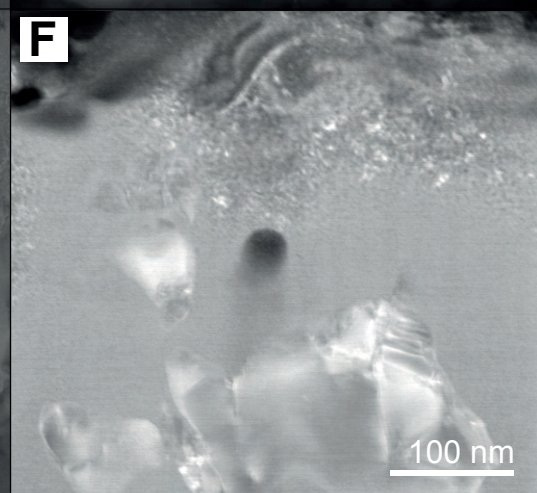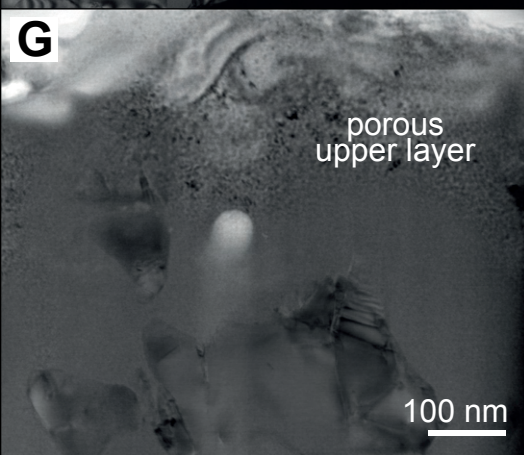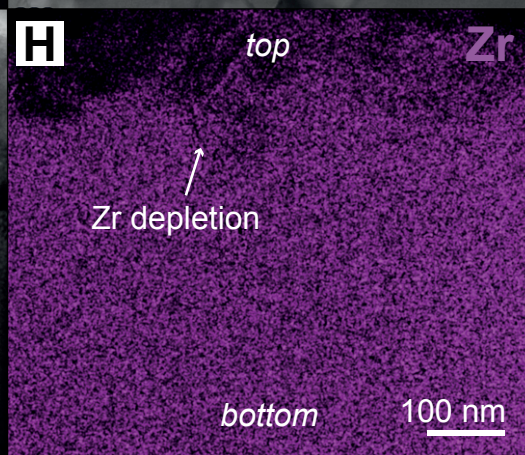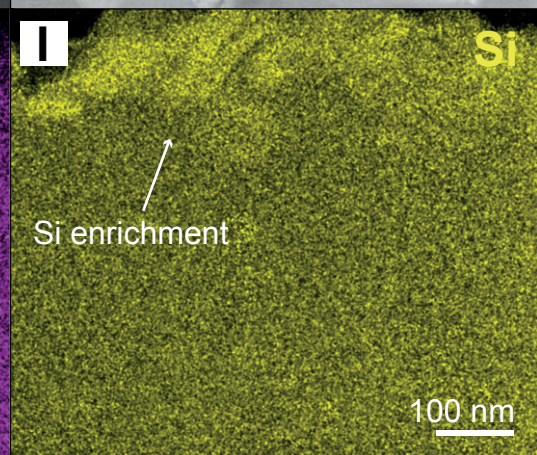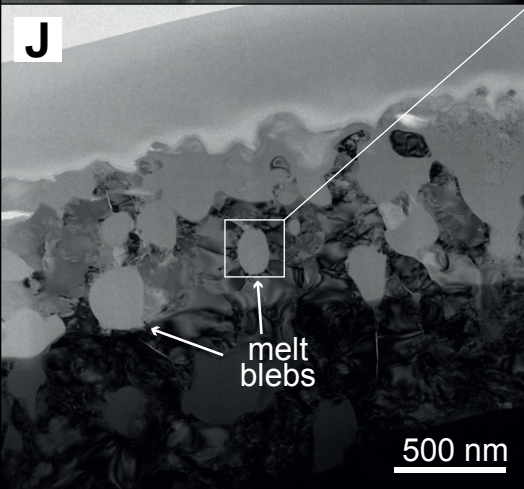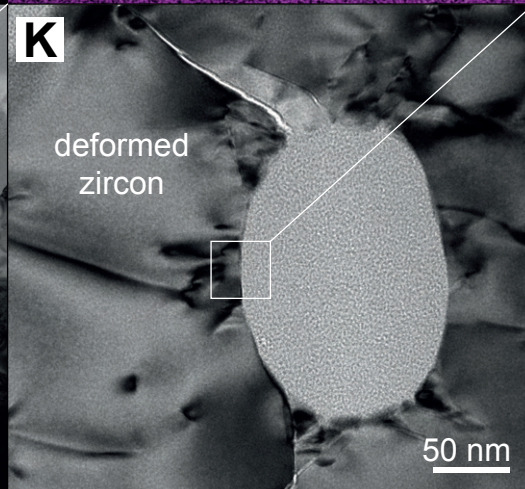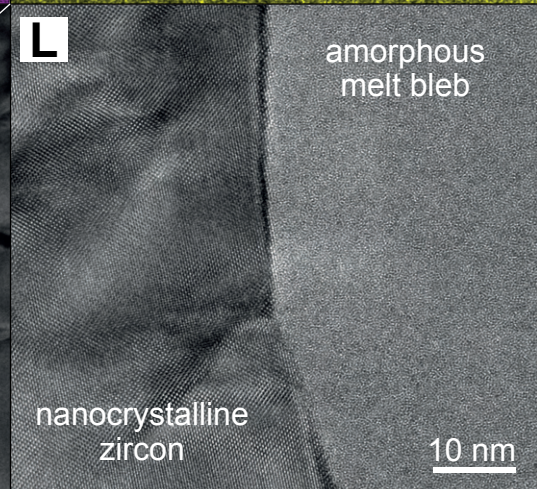



# Fs Laser Irradiation Damage – Helios 5 Laser Hydra UX

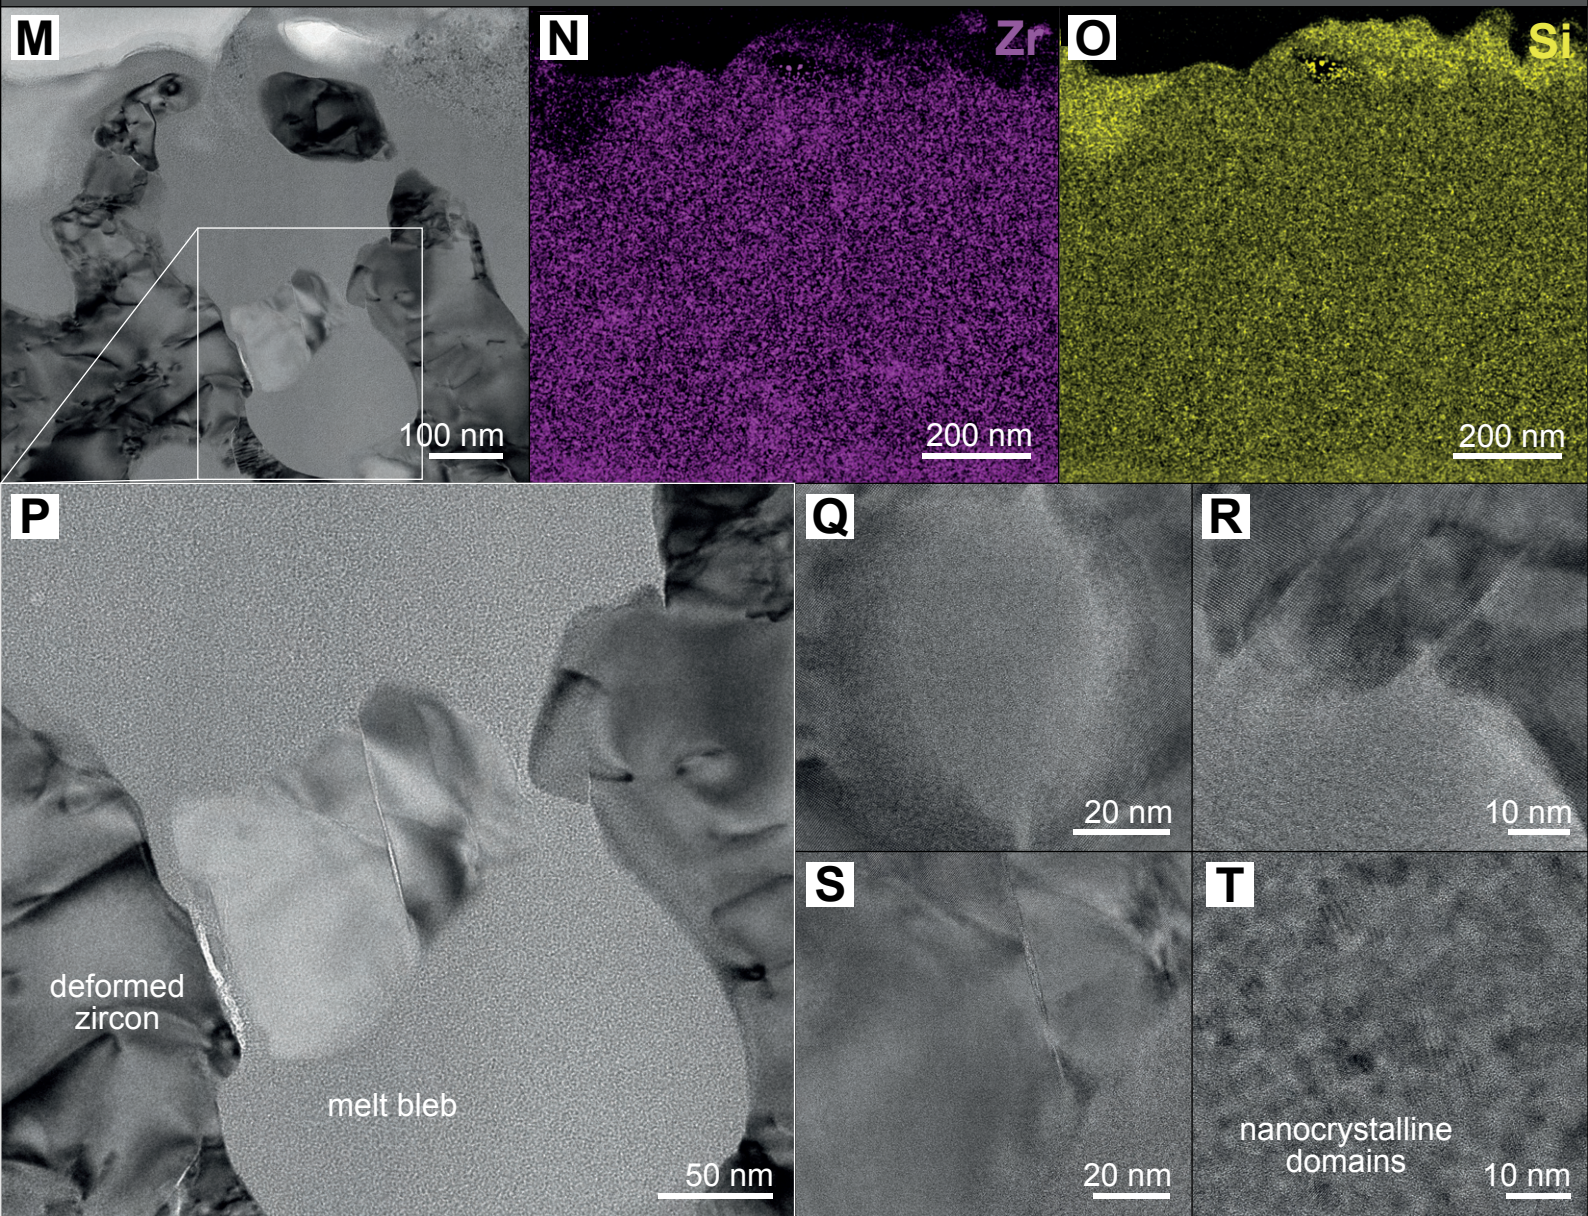

Figure S12: Damage in zircon induced by femtosecond laser machining (515 nm wavelength). TEM images and EDS element maps show a chaotic texture and mobility of Zr and Si in the topmost part immediately exposed to the laser beam. Whole TEM lamella (~2  $\mu\text{m}$ ) of laser-irradiated zircon is damaged and exhibits globular structures.



**A****Lava Creek Tuff Unit A (LCT-A) zircon**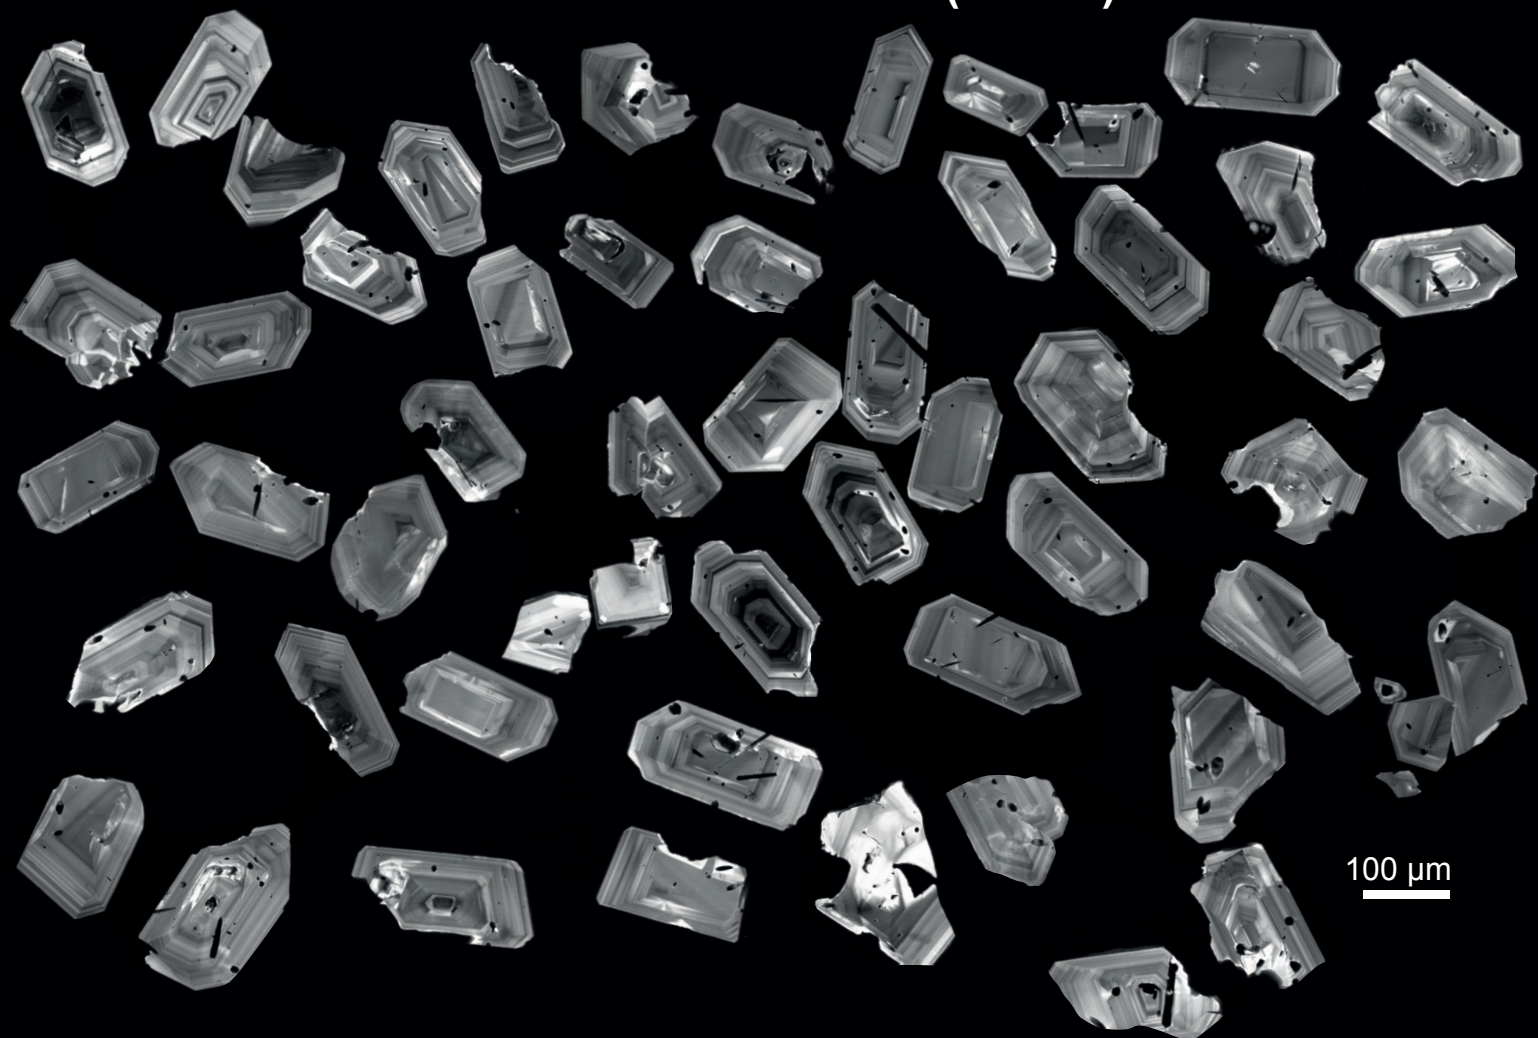**B****OG-1 (Owens Gully Diorite) zircon**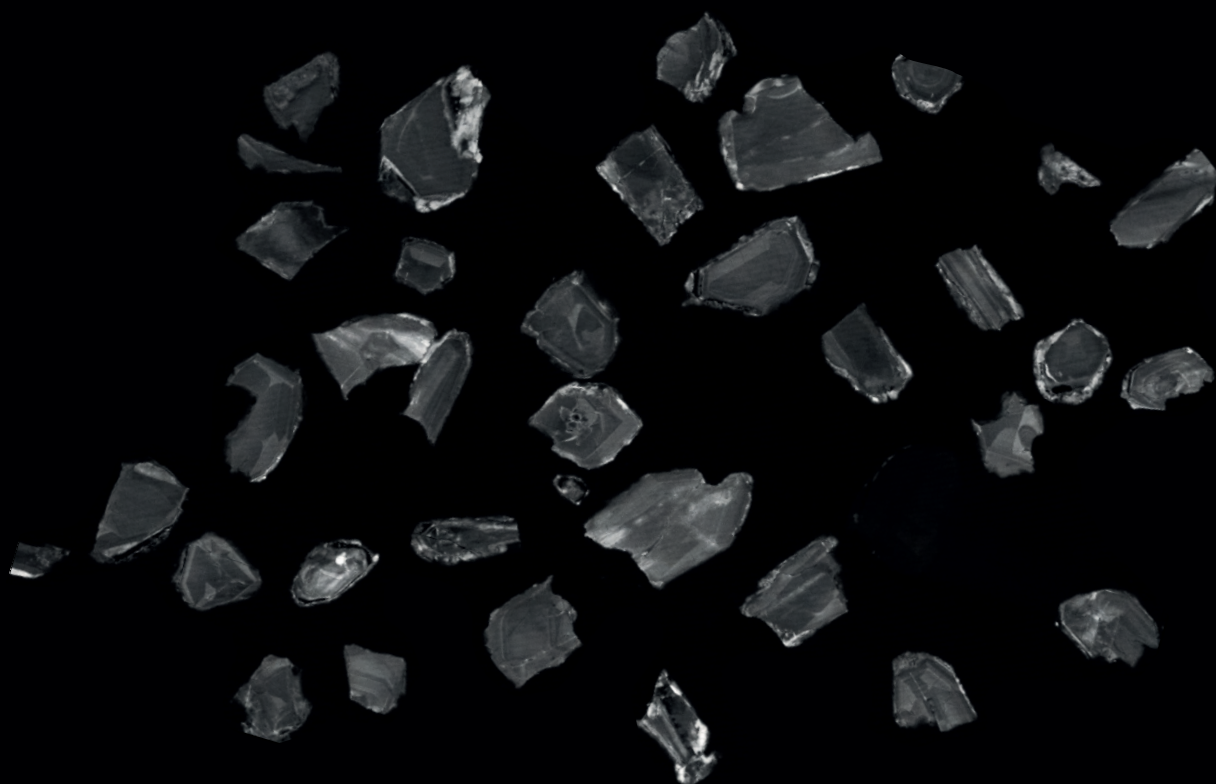

Figure S13: Cathodoluminescence (CL) texture of the Lava Creek Tuff Unit A (LCT-A) and Owen Gully Diorite (OG-1) zircon used in the experiments on the impact of coatings on U-Pb systematics.



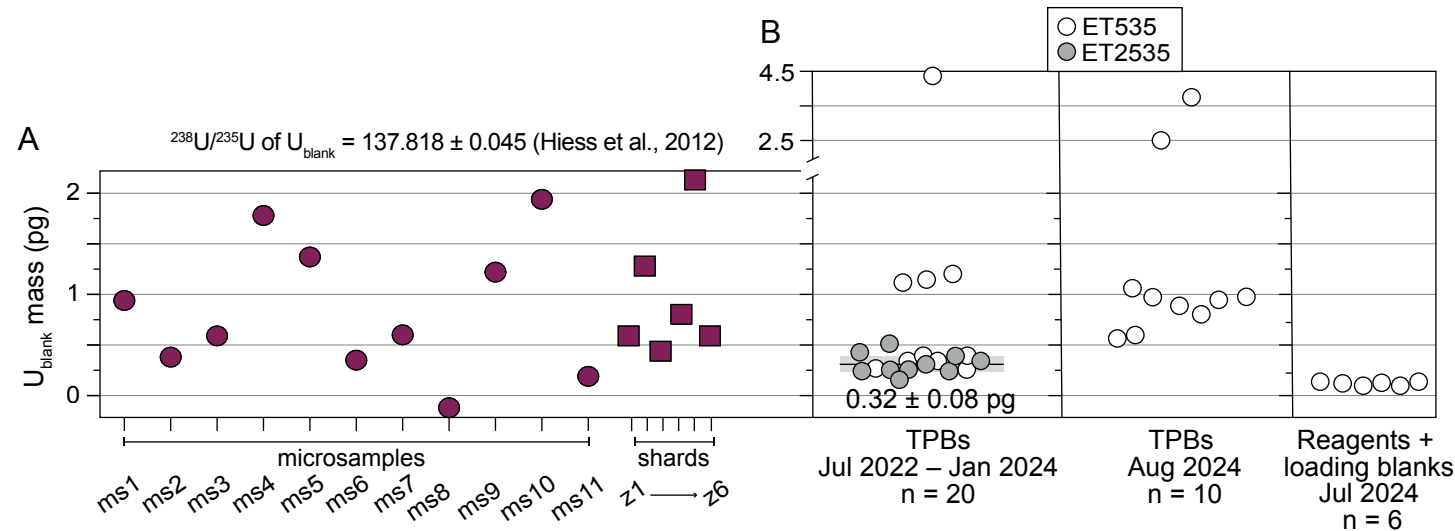

Fig. S14: (A)  $\text{U}_{\text{blank}}$  mass correction for PFIB-machined Mud Tank microsamples and non-irradiated shards required to force concordance at 711 Ma (reference age given by large pieces). The correction assumes a  $^{238}\text{U}/^{235}\text{U}$  of  $\text{U}_{\text{blank}}$  of  $137.8185 \pm 0.045$  of magmatic zircon (Hiess et al., 2012). (B) Mass of U (pg) measured in total procedural blanks (TPBs) and in reagents blanks (including the loading blank) prepared with both ET535 and ET2535 tracer solutions. The reagent blanks were prepared from 30 drops of 6N HCl and 24 drops of  $\text{H}_2\text{O}$  (representative of amounts used to elute Pb and U during chemistry), spiked with one drop of ET535 tracer solution, and dried down with one drop of  $\text{H}_3\text{PO}_4$  acid in beakers used for samples.
