# Supplementary material for: µID-TIMS: spatially resolved high-precision U–Pb zircon geochronology
Source: Copernicus journal article supplement (doi:10.5194/gchron-6-621-2024), 2024-11-26
Supplement: Supplementary file 1 [file gchron-6-621-2024-supplement.zip]

## Sheet: Table S1. In situ U conc.
Lava Creek Tuff Unit-A (LCT-A) zircon (own LA-ICP-MS data)							OG-1 zircon (Stern et al., 2009)			Mud Tank zircon (own LA-ICP-MS data)							GZ7 zircon (own LA-ICP-MS data)						EPMA data (Nasdala et al., 2018)				LA-ICP-MS data (Nasdala et al., 2018)
	Core/rim	U (ppm)	±2σ abs	Th (ppm)	±2σ abs		Oslo-Air Abrasion	U (ppm)			CL tone	U (ppm)	±2σ abs	Th (ppm)	±2σ abs			U (ppm)	±2σ abs	Th (ppm)	±2σ abs		U (ppm)	±2σ abs			av U (ppm)	2SD
LCT-1 - 1	c	2709.42	64.9236	1670.03	35.9849		OG-1 156/49 1 grain, euhedral, stubby prism	310		MT 1	bright	9.24923	0.338617	5.60265	0.148052		GZ7 1	649.733	24.1354	552.381	20.8789		760	0.005			680	31
LCT-1 - 2	r	1187.46	20.5388	451.184	12.1634		OG-1 156/50 1 grain, euhedral, stubby prism	218		MT 2	bright	8.34024	0.131019	5.12194	0.109115		GZ7 2	654.093	24.9157	549.036	20.4171		768	0.005
LCT-2 - 1	c	1620.94	63.353	1001.01	37.435		OG-1 159/29 1 grain, stubby prism	122		MT 3	bright	18.4669	0.533558	11.1142	0.180982		GZ7 3	628.863	22.0132	530.331	17.3244		752	0.005
LCT-2 - 2	r	991.448	14.5441	419.218	6.93545		OG-1 159/49 1 grain, long prism fragment	393		MT 4	bright	11.325	0.266967	6.74401	0.195135								777	0.005
LCT-3 - 2	r	2935.01	36.1847	1637.69	20.9692		OG-1 159/30 1 grain, long prism fragment	150		MT 5	bright	9.27915	0.233488	5.6128	0.134555		Reference materials						793	0.005
LCT-4 - 1	c	1093.68	62.7926	451.559	54.7449		OG-1 161/51 1 grain, stubby prism	222		MT 6	bright	9.26288	0.281118	5.64571	0.287779		91500 zircon						777	0.005
LCT-4 - 2	c	1394.45	28.8896	592.738	18.4622		Toronto-Air Abrasion			MT 7	bright	8.72554	0.248955	5.36205	0.152419		91500 - 1	64.03	1.66305	22.565	0.711979		806	0.005
LCT-6 - 1	c	1557.65	26.1988	779.762	15.1348		sk20p1 1 grain, long prism	137		MT 8	bright	6.05731	0.219501	2.42176	0.0589047		91500 - 2	66.9284	1.92486	23.6396	0.854519		785	0.005
LCT-6 - 2	r	1656.74	25.6272	950.656	23.9369		sk20p2 1 grain, long prism fragment	150		MT 9	bright	10.9356	0.211002	6.62844	0.198009		91500 - 3	63.0496	1.84904	21.8485	0.763835		787	0.005
LCT-7 - 1	c	3321.79	51.728	2207.45	51.4659		sk20p3 1 grain, equant	123		MT 10	bright	10.8204	0.281101	6.36786	0.153081		91500 - 4	70.9783	2.40558	23.0318	0.710543		739	0.005
LCT-7 - 2	r	2647.36	54.1903	1517.24	24.6321		sk20p4 1 grain, equant	98		MT 11	dark	12.2285	0.383028	4.96135	0.226421		91500 - 5	74.4144	2.41634	25.7179	0.949699		762	0.005
LCT-8 - 1	c	1556.15	47.727	839.143	31.7854		sk20p5 fragment of recrystallised grain M2.1	122		MT 12	dark	9.31466	0.286979	3.41125	0.0882378		91500 - 6	63.5651	2.0903	22.0671	0.827579		753	0.005
LCT-8 - 2	r	1391.36	21.1926	566.891	7.45486		sk20p6 fragment of recrystallised grain M2.1	108		MT 13	dark	7.2991	0.171942	2.70952	0.0857038		91500 - 7	74.6934	2.69212	26.1789	0.988323		808	0.005
LCT-9 - 1	c	1445.23	35.3113	757.788	18.1691		sk20p7 fragment of recrystallised grain M2.1	228		MT 14	dark	7.99483	0.199129	2.98073	0.0691668		91500 - 8	65.2148	2.45685	22.8618	0.885921		734	0.005
LCT-9 - 2	r	1603.99	20.3987	797.419	12.472		sk20p8 fragment of recrystallised grain M2.1	146		MT 15	dark	11.8385	0.365788	4.44145	0.176349		91500 - 9	77.4596	3.04052	26.3475	0.948964		730	0.005
LCT-10 - 1	c	1444.24	56.1639	808.338	59.6208		Toronto-Chemical Abrasion (CA)										91500 - 10	63.153	2.30571	22.2544	1.01426		738	0.005
LCT-10 - 2	r	1452.68	22.3089	654.824	10.9826		sk21p61 1 grain	46.1		Reference materials							91500 - 11	65.965	2.01526	23.507	0.83248		793	0.005
LCT-11 - 2	r	1836.54	51.3714	931.802	51.8736		sk21p63 1 grain	47.9		AUSZ7-1 zircon							91500 - 12	77.9677	2.47427	27.887	1.03286		723	0.005
LCT-13 - 1	c	1908.46	68.2922	1120.15	47.0245		sk21p64 1 grain	71.1		Aus Z7-1 - 1		97.6728	1.52831	30.5424	0.500513		91500 - 13	65.43	2.34612	22.8153	0.873915		737	0.005
LCT-13 - 2	r	1678.88	29.8287	858.568	38.1288		sk21p62 1 grain	99		91500 zircon							AUSZ7-1 zircon						710	0.005
LCT-14 - 1	c	1627.82	40.3551	974.484	28.8795					91500 - 1		72.2714	1.568	27.1829	0.66959		AUSZ7-1 - 1	116.309	5.63077	35.7223	1.18281		711	0.005
LCT-14 - 2	r	1540.69	45.9824	799.257	38.2761					GJ1 zircon							AUSZ7-1 - 2	104.979	3.35999	32.2039	0.932485		722	0.005
LCT-16 - 1	c	1315.49	54.256	687.46	51.6431					GJ1 - 1		342.762	5.81624	13.7831	0.252552		AUSZ7-1 - 3	103.463	3.16344	31.9528	0.938936		731	0.005
LCT-16 - 2	r	1720.08	33.7076	849.987	22.9333					GJ1 - 2		369.437	5.64051	14.7337	0.326207		AUSZ7-1 - 4	99.224	3.84654	29.5115	1.04734		694	0.005
LCT-17 - 2	c	1954.91	66.4302	1154.33	53.2371					GJ1 - 3		350.904	5.31549	13.814	0.24927		AUSZ7-1 - 5	88.3697	2.88198	26.6229	0.979901		727	0.005
LCT-17 - 3	r	1620.58	24.8228	695.033	10.4557					GJ1 - 4		353.91	7.84982	14.0311	0.329897		AUSZ7-1 - 6	89.5072	2.4998	26.8892	0.969849		684	0.005
LCT-18 - 2	r	1367.23	43.5285	645.255	24.2297					GJ1 - 5		331.605	5.62114	13.0365	0.281723		AUSZ7-1 - 7	88.8105	2.61183	26.8186	0.761627		752	0.005
LCT-19 - 2	r	1614.36	32.0047	812.661	14.3233					GJ1 - 6		352.67	7.06473	13.4876	0.272925		AUSZ7-1 - 8	93.6406	3.1575	28.2917	1.16068		742	0.005
LCT-20 - 2	r	1698.75	48.9662	856.119	24.1552					Plesovice zircon							AUSZ7-1 - 9	110.565	3.5516	34.9147	1.1547		715	0.005
LCT-21 - 1	c	1578.36	29.361	930.872	21.5412					Plesovice - 1		507.596	7.05308	46.0705	0.534031		AUSZ7-1 - 10	99.287	2.64905	30.6225	0.885261		758	0.005
LCT-21 - 2	r	1722.99	41.8296	975.644	31.5195					Temora2 zircon							AUSZ7-1 - 11	89.2759	3.04371	26.9159	1.07378		722	0.005
LCT-22 - 1	c	1533.28	45.7424	954.624	34.2395					Temora - 1		75.3306	1.89876	34.5701	1.11017		AUSZ7-1 - 12	86.4127	3.20057	26.3225	0.851287		760	0.005
LCT-22 - 2	r	1403.45	19.4417	690.515	10.1059												AUSZ7-5 zircon						717	0.005
LCT-23 - 1	c	2171.05	88.5215	1373.82	67.5883												AUSZ7-5 - 1	95.3897	3.43844	60.0523	2.34607		746	0.005
LCT-23 - 2	r	2048.08	81.4443	1144.7	63.3005												AUSZ7-5 - 2	96.4265	2.98192	59.1765	2.19648		740	0.005
LCT-24 - 1	c	2027.34	47.7223	1256.96	33.5622												AUSZ7-5 - 3	92.7394	2.87651	58.2333	1.94481		772	0.005
LCT-24 - 2	r	2299.27	31.2758	1369.07	26.8636												AUSZ7-5 - 4	91.5436	2.76152	55.7422	1.88772		723	0.005
LCT-25 - 1	c	2742.98	108.135	1450.34	94.5223												AUSZ7-5 - 5	74.5145	2.58468	41.2506	1.42481		722	0.005
LCT-26 - 2	r	1244.48	29.3915	668.974	18.8114												AUSZ7-5 - 6	96.6251	3.06982	59.7681	1.83736		758	0.005
LCT-27 - 1	c	2416	37.4246	1304.74	50.6792												AUSZ7-5 - 7	102.94	3.44835	65.0312	1.83566		753	0.005
LCT-27 - 2	r	1272.8	23.7864	514.444	20.5314												AUSZ7-5 - 8	83.9406	2.58099	48.398	1.95804		788	0.005
LCT-30 - 1	c	1866.03	67.5227	973.163	48.8259												AUSZ7-5 - 9	96.3793	3.13268	58.5266	1.84524		766	0.005
LCT-30 - 2	r	1264.61	27.9431	507.237	7.80575												AUSZ7-5 - 10	92.7261	3.53875	56.0375	1.60194		776	0.005
LCT-31 - 1	c	1537.3	33.2797	881.434	20.0943												AUSZ7-5 - 11	76.8466	1.92662	43.3992	1.15612		723	0.005
LCT-31 - 2	r	1876.6	37.3476	1102.68	18.2353												AUSZ7-5 - 12	99.8181	3.60784	62.3072	2.06006		785	0.005
LCT-32 - 1	c	958.471	53.8304	305.532	20.9724												GJ-1 zircon						774	0.005
LCT-32 - 2	r	1247.24	21.0603	521.604	7.22865												GJ-1 - 1	315.476	9.08287	11.7515	0.391694		743	0.005
LCT-33 - 1	c	1928.94	81.7369	1024.67	54.0568												GJ-1 - 2	317.648	9.16808	11.7777	0.432732		781	0.005
LCT-33 - 2	r	1554.57	41.8156	684.403	22.3329												GJ-1 - 3	314.354	9.39719	11.7832	0.433834		758	0.005
LCT-34 - 2	r	1376.65	29.1678	643.327	16.8352												GJ-1 - 4	326.621	9.63216	12.101	0.406959		812	0.005
LCT-36 - 1	c	1372.65	39.7162	689.158	20.4564												GJ-1 - 5	324.914	10.8576	12.1667	0.398022		769	0.005
LCT-36 - 2	r	2452.78	50.54	1172.2	26.0616												GJ-1 - 6	322.085	6.86709	12.1218	0.362664		793	0.005
LCT-37 - 2	r	1390.82	28.9474	620.907	12.0154												GJ-1 - 7	330.182	12.8826	12.0305	0.413794		823	0.005
LCT-39 - 1	c	2902.18	86.1539	1700.77	46.1935												GJ-1 - 8	324.258	11.1792	12.3074	0.598329		835	0.005
LCT-39 - 2	r	1839.5	59.6205	1029.45	24.1138												GJ-1 - 9	317.314	15.6965	12.0299	0.581323		750	0.005
LCT-40 - 1	c	1307.32	34.1873	664.404	13.7773												GJ-1 - 10	351.866	14.892	13.2284	0.642085		783	0.005
LCT-40 - 2	r	1478.37	33.4754	648.961	14.5722												GJ-1 - 11	324.865	10.8511	12.0874	0.38942		792	0.005
LCT-42 - 1	c	1108.07	42.7003	530.047	25.1858												GJ-1 - 12	316.638	9.20908	11.9759	0.431028		765	0.005
LCT-42 - 2	r	1570.36	35.6986	807.047	33.0882												GJ-1 - 13	324.757	21.758	12.5064	0.91184		665	0.005
LCT-43 - 2	r	1301.78	20.7263	670.103	10.4703												GJ-1 - 14	322.037	12.3696	12.169	0.492781		671	0.005
LCT-44 - 1	c	1626.27	46.6034	951.671	24.0354												GJ-1 - 15	320.806	12.167	11.595	0.458306		713	0.005
LCT-44 - 2	r	1394.45	28.3164	661.272	15.8703												GJ-1 - 16	315.51	10.0562	11.7239	0.37363		721	0.005
LCT-45 - 1	c	1590.5	33.2965	912.173	23.453												GJ-1 - 17	324.749	9.69498	12.4794	0.415392		729	0.005
LCT-45 - 2	r	1656.93	21.2297	900.362	16.7905												GJ-1 - 18	314.993	8.38099	12.1767	0.471279		753	0.005
LCT-47 - 2	r	1785.83	29.4548	765.062	17.022												GJ-1 - 19	332.772	10.39	12.2501	0.46503		726	0.005
LCT-48 - 1	c	1311.31	30.0413	747.958	23.4932												GJ-1 - 20	328.147	12.7909	11.9154	0.483124		710	0.005
LCT-48 - 2	r	1626.43	62.2021	942.616	41.2605												GJ-1 - 21	323.954	8.74843	12.1765	0.476661		781	0.005
LCT-50 - 2	r	1243.79	24.1787	558.23	17.8539												GJ-1 - 22	333.286	12.9101	12.8926	0.671714		738	0.005
LCT-51 - 1	c	1218.29	70.5458	589.063	61.4966												GJ-1 - 23	320.58	11.0085	12.0287	0.360015		709	0.005
LCT-52 - 1	c	1152.93	44.993	572.621	31.2103												GJ-1 - 24	312.067	10.6448	11.7784	0.490459		761	0.005
LCT-52 - 2	r	1622.09	31.7185	794.526	15.8208												GJ-1 - 25	326.678	10.1121	11.8603	0.386289		727	0.005
LCT-53 - 2	r	1284.29	34.0293	662.222	19.6												GJ-1 - 26	319.214	9.83068	12.3314	0.459688		756	0.005
LCT-54 - 1	c	1496.96	81.9289	820.994	56.7228												GJ-1 - 27	334.895	11.0665	12.333	0.444772		802	0.005
LCT-54 - 2	r	2209.15	36.4275	1409.95	22.1396												GJ-1 - 28	336.406	10.1635	12.7735	0.430005		752	0.005
LCT-55 - 1	c	2050.11	36.4681	1343.86	29.2041												GJ-1 - 29	326.753	11.2512	12.1988	0.452356		749	0.005
LCT-55 - 2	r	1525.46	38.8405	660.96	18.5809												GJ-1 - 30	319.789	9.84181	12.0719	0.430634		753	0.005
LCT-56 - 1	c	1914.99	84.3101	1133.29	62.8751												GJ-1 - 31	326.137	8.76581	12.5379	0.390266		783	0.005
LCT-56 - 2	r	1158.59	24.6683	482.872	9.2835												GJ-1 - 32	330.499	9.7585	12.0256	0.391062		798	0.005
LCT-57 - 1	c	1355.27	30.6364	740.237	20.6244												GJ-1 - 33	317.647	8.60811	11.8293	0.367687		779	0.005
LCT-57 - 2	r	1071.47	28.9441	424.868	8.97648												GJ-1 - 34	330.976	10.1575	12.1866	0.36662		779	0.005
LCT-58 - 2	r	1964.5	34.4388	1004.62	13.8954												GJ-1 - 35	317.126	9.25265	12.2217	0.42891		792	0.005
																	GJ-1 - 36	323.874	13.4114	12.5167	0.601524		954	0.005
Reference materials																	Plesovice zircon						856	0.005
91500 zircon																	Plesovice - 1	1247.93	28.5494	168.293	4.40005		864	0.005
91500 - 1		80.4576	1.85645	29.5976	0.815329												Plesovice - 2	772.126	25.3352	76.8481	2.30552
91500 - 2		66.7048	1.80442	24.5108	0.614887												Plesovice - 3	665.326	24.7134	62.1623	2.77047
91500 - 3		80.3041	1.48731	29.03	0.612853												Plesovice - 4	871.628	27.8953	90.5436	3.15589
91500 - 4		53.2377	1.15408	14.534	0.333849												Plesovice - 5	649.631	35.0119	59.2107	2.75772
91500 - 5		64.2477	1.6046	23.3195	0.570313												Plesovice - 6	682.268	23.6923	61.6433	2.22623
91500 - 6		75.1896	1.37037	27.2098	0.667007												Plesovice - 7	773.79	27.2212	76.4354	2.50733
91500 - 7		69.3019	1.7109	25.5674	0.526756												Plesovice - 8	639.653	15.7052	58.9412	1.43414
91500 - 8		78.9353	1.60872	28.6244	0.545173												Plesovice - 9	807.345	21.8933	84.5279	2.38071
91500 - 9		65.1758	1.61238	23.7538	0.632418												Plesovice - 10	396.497	10.2674	32.5624	0.979489
91500 - 10		54.8437	1.14885	14.7299	0.374895												Plesovice - 11	607.555	23.6445	56.4345	1.95754
91500 - 11		64.9456	1.34348	23.2034	0.480611												Temora2 zircon
91500 - 12		81.6185	1.71353	30.902	0.87368												Temora - 1	147.092	6.49589	56.1732	1.90013
91500 - 13		67.9324	1.58409	26.7027	0.577938												Temora - 2	183.056	4.18446	105.042	2.26331
91500 - 14		68.9294	1.41394	27.7395	0.673869												Temora - 3	67.8165	1.42155	20.4139	0.59764
91500 - 15		69.7337	1.63525	27.4609	0.628404												Temora - 4	132.361	4.59626	66.4527	2.43664
91500 - 16		72.9624	1.45712	30.97	0.883729												Temora - 5	136.033	3.33631	64.5313	1.60713
91500 - 17		69.9186	1.9263	29.703	0.771966												Temora - 6	82.479	3.93676	24.9	1.11387
91500 - 18		69.687	1.30175	28.8723	0.851718												Temora - 7	151.71	4.78191	82.5836	2.28371
91500 - 19		72.1164	1.6916	29.5447	0.835329												Temora - 8	88.1959	3.93639	40.0237	1.78675
AUSZ7-1 zircon																	Temora - 9	174.259	4.8204	89.7097	3.19177
AUSZ7-1 - 1		112.523	1.99899	36.7813	0.655564												Temora - 10	88.8272	2.10784	42.6768	1.1601
AUSZ7-1 - 2		97.0011	1.86152	31.0958	0.715305												Temora - 11	79.7053	4.6843	24.1615	1.36329
AUSZ7-1 - 3		93.2911	2.02827	29.1274	0.697847
AUSZ7-1 - 4		96.3204	2.02283	30.4423	0.567778
AUSZ7-1 - 5		114.877	2.59064	37.6023	0.893922
AUSZ7-1 - 6		116.33	2.3687	38.143	0.682099
AUSZ7-1 - 7		95.917	2.37856	29.1021	0.775978
AUSZ7-5 zircon
AUSZ7-5 - 1		104.672	1.81444	71.0809	1.59883
AUSZ7-5 - 2		108.514	3.96034	76.0895	3.07285
AUSZ7-5 - 3		113.882	2.4017	81.032	1.9541
AUSZ7-5 - 4		103.4	2.53942	69.4383	1.41681
AUSZ7-5 - 5		101.514	2.01958	67.335	1.64703
AUSZ7-5 - 6		106.402	3.15333	73.7584	1.81126
AUSZ7-5 - 7		103.231	2.84467	65.7851	1.65508
GJ-1 zircon
GJ-1 - 1		328.72	7.8442	12.9196	0.281689
GJ-1 - 2		331.586	6.39355	12.944	0.289595
GJ-1 - 3		329.696	6.04781	13.2326	0.240896
GJ-1 - 4		327.334	5.7787	13.0554	0.274584
GJ-1 - 5		330.669	5.63126	13.0841	0.348144
GJ-1 - 6		336.142	9.79628	13.4335	0.500854
GJ-1 - 7		323.532	5.89043	13.2141	0.34241
GJ-1 - 8		324.443	7.25226	12.9948	0.232653
GJ-1 - 9		327.18	6.18288	13.1767	0.261448
GJ-1 - 10		329.904	7.91432	13.2581	0.31998
GJ-1 - 11		325.897	6.55902	12.9657	0.333504
GJ-1 - 12		333.854	6.97835	13.477	0.291848
GJ-1 - 13		329.451	5.99661	13.0439	0.259236
GJ-1 - 14		325.168	7.16824	13.1529	0.279638
GJ-1 - 15		330.805	8.16345	13.0795	0.386515
GJ-1 - 16		328.991	6.22057	13.3682	0.292898
GJ-1 - 17		323.753	5.70215	13.2817	0.395395
GJ-1 - 18		327.051	7.08249	13.3543	0.286849
GJ-1 - 19		330.939	6.0058	13.511	0.207278
GJ-1 - 20		326.167	7.03353	13.1418	0.332804
GJ-1 - 21		329.851	7.11471	13.5003	0.285404
Plesovice zircon
Plesovice - 1		2377.08	46.801	322.613	5.77986
Plesovice - 2		679.563	15.0365	67.033	1.52871
Plesovice - 3		652.962	15.7295	61.6334	1.68284

## Sheet: Table S2. CA-ID-TIMS U-Pb
Lava Creek Tuff Unit A (LCT-A) zircon – Polished grains
		Dates (Ma)								Composition					Isotopic Ratios
	Chemical abrasion	230Th-corr. 206Pb/238U a	±2σ abs	206Pb/238U b	±2σ abs	207Pb/235U b	±2σ abs	207Pb/206Pb b	±2σ abs	U mass (pg)	Th/U c	Pb* (pg) d	Pbc (pg) e	Pb*/Pbc f	206Pb/204Pb g	230Th-corr. 206Pb/238U h,a	±2σ %	206Pb/238U h	±2σ %	207Pb/235U h	±2σ %	207Pb/206Pb h	±2σ %	Corr. coef.	ET535 mass (mg)
Polished grains
Pt-coated
Pt z1	190 °C 14 h	0.636077	0.0182801	0.550595	0.00443955	0.761817	0.0896793	732.71	234.967	7789.27	0.571157	0.730179	0.272045	2.68404	170.074	9.86763e-05	2.87402	8.54147e-05	0.806352	0.000750557	11.7762	0.0637593	11.0929	0.856925	8.7
Pt z2	190 °C 14 h	0.638854	0.0261666	0.553174	0.0276344	0.862296	0.567907	980.384	1250.08	2547.5	0.730424	0.25261	0.579425	0.435967	41.8009	9.91071e-05	4.09606	8.58148e-05	4.99582	0.000849593	65.8879	0.0718358	61.3706	0.911119	5.2
Pt z3	190 °C 14 h	0.635581	0.0193255	0.550008	0.0109192	0.889071	0.223646	1053.98	470.962	5926.26	0.645964	0.571803	0.513541	1.11345	79.4669	9.85994e-05	3.04075	8.53236e-05	1.98536	0.000875985	25.166	0.0744938	23.3808	0.906718	9.5
Pt z4	190 °C 14 h	0.628497	0.0186137	0.543075	0.00770866	0.81775	0.156063	909.445	366.751	3187.15	0.525167	0.292109	0.195597	1.49343	103.539	9.75004e-05	2.96176	8.4248e-05	1.41951	0.000805686	19.0922	0.0693902	17.8088	0.910869	10.1
Cr-coated
Cr z1	190 °C 14 h	0.631616	0.0181996	0.546185	0.00325412	0.751846	0.0654866	721.819	173.524	6814.31	0.531902	0.626328	0.170762	3.66785	228.097	9.79842e-05	2.88158	8.47305e-05	0.595816	0.00074073	8.71334	0.0634326	8.17763	0.905574	9.7
Cr z2	190 °C 14 h	0.634885	0.0204116	0.549336	0.0153071	0.953773	0.315793	1196.48	602.812	3142.52	0.626401	0.302441	0.38305	0.789559	61.7608	9.84914e-05	3.21517	8.52195e-05	2.78659	0.000939765	33.1254	0.0800153	30.563	0.926051	10.3
Cr z3	190 °C 14 h	0.628231	0.0189775	0.542715	0.00955518	0.824096	0.19384	926.713	450.548	1875.83	0.598162	0.175604	0.142079	1.23596	87.3389	9.7459e-05	3.02094	8.41922e-05	1.7607	0.000811941	23.5311	0.0699753	21.9367	0.912272	9.8
Cr z4	190 °C 14 h	0.617346	0.027573	0.531733	0.03199	0.792277	0.655005	887.679	1596.48	1527.13	0.680299	0.143335	0.396683	0.361335	38.0965	9.57704e-05	4.46658	8.24884e-05	6.01643	0.000780578	82.706	0.0686619	77.2589	0.911923	10.3
C-coated
z1	190 °C 14 h	0.631382	0.0181944	0.545892	0.00368733	0.773704	0.0747765	783.48	190.305	3953.39	0.576145	0.368489	0.116122	3.1733	197.207	9.79479e-05	2.88182	8.46851e-05	0.675497	0.000762273	9.66842	0.0653125	9.05842	0.909403	9.2
z2	190 °C 14 h	0.62941	0.0188057	0.543834	0.00854084	0.85824	0.174123	1005.42	383.07	1657.66	0.64653	0.158002	0.110598	1.42862	96.8227	9.7642e-05	2.98797	8.43658e-05	1.57055	0.000845595	20.297	0.0727258	18.8782	0.91044	8.8
z3	190 °C 14 h	0.630912	0.0181873	0.545389	0.00380383	0.773162	0.0742894	783.946	188.704	2478.76	0.60121	0.232527	0.0675484	3.44238	210.952	9.78749e-05	2.88285	8.4607e-05	0.697482	0.000761739	9.61217	0.0653269	8.98292	0.908856	11.5
z4	190 °C 14 h	0.629133	0.0195428	0.543561	0.0119523	0.820225	0.244727	913.824	573.326	1982.34	0.642574	0.188185	0.191971	0.980277	72.4038	9.7599e-05	3.10646	8.43235e-05	2.19898	0.000808125	29.8486	0.069538	27.8587	0.911585	12.5
a Corrected for initial Th/U disequilibrium using zircon-melt DTh/U = 0.214 ± 0.079 (Wotzlaw et al., 2015).
b Isotopic dates calculated using λ238 = 1.55125E-10 (Jaffey et al. 1971) and λ235 = 9.8485E-10 (Jaffey et al. 1971).
c Th contents calculated from radiogenic 208Pb and 230Th-corrected 206Pb/238U date of the sample, assuming concordance between U-Pb Th-Pb systems.
d Total mass of radiogenic Pb.
e Total mass of common Pb.
f Ratio of radiogenic Pb (including 208Pb) to common Pb.
g Measured ratio corrected for fractionation and spike contribution only.
h Measured ratios corrected for fractionation, tracer and blank.
Owen Gully Diorite (OG-1) zircon – Polished grains
		Dates (Ma)							Composition					Isotopic Ratios
	Chemical abrasion	207Pb/206Pb a	±2σ abs	206Pb/238U a	±2σ abs	207Pb/235U a	±2σ abs	% disc b	U mass (pg)	Th/U c	Pb* (pg) d	Pbc (pg) e	Pb*/Pbc f	206Pb/204Pb g	207Pb/206Pb h	±2σ %	206Pb/238U h	±2σ %	207Pb/235U h	±2σ %	Corr. coef.	ET2535 mass (mg)
Polished grains
Pt-coated
z1	190 °C 14 h	3464.32	0.513815	3445.36	1.54481	3457.36	0.66439	0.54744	369.519	0.704064	333.794	0.16412	2033.84	98824.3	0.298993	0.00721884	0.706529	0.0578818	29.1138	0.06768	0.871936	6.8
z2	190 °C 14 h	3464.82	0.512788	3450.46	3.70746	3459.55	1.40226	0.414251	191.258	0.922809	179.886	0.19102	941.715	44041.4	0.299088	0.00691378	0.707881	0.138757	29.1788	0.142835	0.972793	8
z3	190 °C 14 h	3464.99	0.507802	3456.8	2.20427	3461.99	0.871461	0.236645	203.854	0.87028	190.441	0.139003	1370.05	64652.5	0.299123	0.00516087	0.709559	0.0823839	29.2513	0.0887599	0.92935	8.4
z4	190 °C 14 h	3465.53	0.510597	3454.93	1.42141	3461.65	0.620339	0.305845	354.245	0.815764	327.598	0.217404	1506.86	71781.3	0.299227	0.00621091	0.709065	0.0531462	29.2411	0.0631834	0.85332	8.8
z5	210 °C 10 h	3466.31	0.546407	3465.51	3.25184	3466.02	1.24474	0.0231048	136.062	0.905915	128.325	0.279438	459.223	21514.9	0.299377	0.014013	0.711872	0.121305	29.3717	0.126761	0.96053	7.5
z6	210 °C 10 h	3466.46	1.05349	3464.04	8.9412	3465.57	3.37977	0.0696868	48.7542	0.601226	43.5392	0.476941	91.2884	4528.94	0.299405	0.0597977	0.711482	0.333646	29.3583	0.344194	0.980356	7.6
z7	210 °C 10 h	3466.37	0.776996	3452.67	6.53135	3461.35	2.46884	0.395327	69.8733	0.738637	63.6964	0.43057	147.935	7148.61	0.299389	0.0383081	0.708465	0.244327	29.2322	0.251461	0.979949	7.7
z8	210 °C 10 h	3466.61	0.545502	3461.1	3.38746	3464.59	1.29436	0.159044	130.662	0.783556	120.438	0.277946	433.315	20738.6	0.299434	0.0138673	0.7107	0.126486	29.3289	0.131821	0.963682	7.8
z9	210 °C 10 h	3465.47	0.549611	3457.66	3.98619	3462.61	1.50826	0.225186	110.355	0.915886	103.95	0.2415	430.436	20133.4	0.299214	0.0145202	0.709789	0.148954	29.2697	0.153616	0.972984	8.1
z10	210 °C 10 h	3466.33	0.719078	3411.21	9.38148	3446.02	3.51557	1.59014	49.2771	0.624715	43.3414	0.257294	168.451	8303.23	0.29938	0.0332651	0.697512	0.354172	28.7794	0.358261	0.991579	7
z11	210 °C 10 h	3466.39	0.878722	3447.17	9.61082	3459.34	3.598	0.554668	46.2055	0.678183	41.5837	0.348504	119.321	5831.76	0.299393	0.0465736	0.707008	0.35996	29.1725	0.366495	0.987972	8.1
z12	210 °C 10 h	3466.33	0.562547	3458.12	4.62438	3463.32	1.73852	0.236995	94.2091	0.923916	88.889	0.243451	365.121	17055.7	0.299381	0.0164598	0.70991	0.172785	29.2911	0.177063	0.978756	8.3
Cr-coated
z1	190 °C 14 h	3466.22	0.507948	3459.27	1.10458	3463.67	0.523751	0.200499	503.723	0.883664	472.173	0.399338	1182.39	55662.5	0.299359	0.00523876	0.710215	0.041261	29.3015	0.053342	0.78901	7.5
z2	190 °C 14 h	3464.99	0.506003	3454.74	1.17313	3461.23	0.542078	0.295617	504.992	0.731614	460.041	0.112675	4082.91	197393	0.299121	0.0043632	0.709014	0.0438651	29.2287	0.0552131	0.806452	7.6
z3	190 °C 14 h	3465.9	0.509482	3454.54	1.8118	3461.73	0.742815	0.327642	263.952	0.884644	247.025	0.149139	1656.34	77953.3	0.299297	0.00582201	0.708961	0.0677488	29.2437	0.0756577	0.900638	7.3
z4	190 °C 14 h	3466.44	0.517026	3461.61	2.84821	3464.67	1.0963	0.139298	157.551	0.818483	146.142	0.257548	567.434	27027.5	0.299401	0.00813861	0.710835	0.106339	29.3312	0.11165	0.954295	8.3
z5	190 °C 14 h	3465.95	0.510192	3460.97	1.96302	3464.12	0.793304	0.143735	257.571	0.747701	235.882	0.315424	747.824	36063.4	0.299307	0.00607616	0.710665	0.0733005	29.3149	0.0807937	0.913205	7.8
z6	210 °C 10 h	3466.69	0.513203	3462.8	3.56433	3465.27	1.3468	0.112184	132.916	0.93631	125.898	0.221686	567.912	26502.3	0.299451	0.00706207	0.711153	0.133041	29.3492	0.137159	0.970402	7.9
z7	210 °C 10 h	3466.45	0.539901	3462.34	5.38126	3464.94	2.00312	0.118407	80.8633	1.04441	78.0012	0.328453	237.481	10891.3	0.299403	0.0129209	0.71103	0.200879	29.3394	0.204002	0.985304	8.1
z8	210 °C 10 h	3466.4	0.509662	3463.28	2.23168	3465.25	0.881585	0.0900173	211.778	1.00637	203.038	0.331293	612.865	28259.8	0.299393	0.00589392	0.711278	0.0832903	29.3487	0.0897812	0.930471	7.2
z9	210 °C 10 h	3466.48	0.693013	3446.51	11.1694	3459.15	4.13453	0.576044	39.0268	0.776415	35.7358	0.238214	150.015	7211.12	0.299409	0.0308754	0.706833	0.418395	29.1669	0.42115	0.994345	8.2
z10	210 °C 10 h	3466.43	0.551636	3424.46	7.16944	3450.99	2.6729	1.21078	105.255	0.759144	95.3086	0.438782	217.212	10463.1	0.2994	0.0148427	0.701005	0.269868	28.9254	0.272341	0.991418	8.1
C-coated
z1	210 °C 10 h	3466.23	0.593984	3447.98	7.99809	3459.54	2.96618	0.526737	56.0685	1.05485	53.8958	0.366549	147.036	6737.71	0.299362	0.0205511	0.707222	0.299504	29.1783	0.302136	0.991918	8.1
z2	210 °C 10 h	3466.41	0.513798	3462.16	1.99651	3464.85	0.80578	0.12259	228.68	0.93146	216.367	0.377341	573.398	26781.2	0.299396	0.00723702	0.710982	0.0745314	29.3367	0.0820623	0.914741	7.6
z3	210 °C 10 h	3466.65	0.531943	3437.58	5.01835	3455.97	1.87987	0.838587	111.149	0.925563	104.122	0.262905	396.046	18517.4	0.299442	0.0114654	0.70447	0.188352	29.0725	0.191507	0.983799	7.5
z4	210 °C 10 h	3466.37	0.798845	3469.25	12.1718	3467.43	4.48761	-0.0830279	35.6242	0.650517	32.1605	0.555031	57.9436	2860.39	0.299389	0.0401364	0.712866	0.453683	29.4138	0.456988	0.993616	7.9
z5	210 °C 10 h	3466.36	0.53859	3466.55	4.91971	3466.43	1.83525	-0.00569278	88.9016	0.872129	83.389	0.355068	234.854	11093.5	0.299386	0.0126903	0.712149	0.183481	29.3839	0.186896	0.982552	8
z6	210 °C 10 h	3466.51	0.517571	3464.19	3.77558	3465.66	1.42268	0.06699	130.764	0.628854	117.372	0.314989	372.622	18365.1	0.299416	0.0082825	0.711522	0.140883	29.361	0.144885	0.973059	7.6
z7	210 °C 10 h	3466.47	0.601534	3404.29	8.75946	3443.55	3.27345	1.79385	51.2868	0.792312	46.3677	0.385374	120.319	5769.11	0.299408	0.0214475	0.695691	0.3312	28.7069	0.333616	0.993206	8.2
z8	210 °C 10 h	3466.99	0.706472	3464.13	11.3269	3465.94	4.17613	0.0826559	40.9192	0.783554	37.7609	0.444731	84.9073	4084.62	0.299509	0.0321233	0.711504	0.422663	29.3694	0.42529	0.994236	8.5
z9	210 °C 10 h	3466.3	0.5616	3450.9	6.6853	3460.65	2.48398	0.444186	68.7295	0.608223	61.1589	0.356193	171.702	8503.74	0.299374	0.0163243	0.707996	0.250184	29.2114	0.25301	0.989686	8.1
z10	210 °C 10 h	3466.52	0.517135	3459.98	3.48436	3464.12	1.32171	0.188701	179.556	0.667758	162.055	0.329285	492.141	24079.3	0.299417	0.00816828	0.710403	0.130136	29.315	0.134609	0.968775	7.8
z11	210 °C 10 h	3466.22	0.65411	3433.99	9.44861	3454.38	3.50969	0.929915	47.3493	0.800302	43.3387	0.346835	124.955	5983.95	0.29936	0.0271095	0.703522	0.354911	29.0254	0.357561	0.993006	8.2
z12	210 °C 10 h	3465.91	0.62615	3444.07	11.6439	3457.89	4.30387	0.630071	39.5528	0.764301	36.1049	0.336212	107.387	5178.61	0.299299	0.0242022	0.706188	0.436401	29.1295	0.438418	0.995743	8.1
z13	210 °C 10 h	3466.32	0.526758	3461.83	4.54716	3464.68	1.70108	0.12948	110.641	0.615591	98.9828	0.370361	267.261	13209.3	0.299379	0.0104179	0.710896	0.169762	29.3315	0.173243	0.980556	7.9
a Isotopic dates calculated using λ238 = 1.55125E-10 (Jaffey et al. 1971) and λ235 = 9.8485E-10 (Jaffey et al. 1971).
b % discordance = 100 - (100 * (206Pb/238U date) / (207Pb/206Pb date))
c Th contents calculated from radiogenic 208Pb and 230Th-corrected 206Pb/238U date of the sample, assuming concordance between U-Pb Th-Pb systems.
d Total mass of radiogenic Pb.
e Total mass of common Pb.
f Ratio of radiogenic Pb (including 208Pb) to common Pb.
g Measured ratio corrected for fractionation and spike contribution only.
h Measured ratios corrected for fractionation, tracer and blank.
Mud Tank zircon
						Dates (Ma)							Composition					Isotopic Ratios
	Chemical abrasion					206Pb/238U a	±2σ abs	207Pb/235U a	±2σ abs	207Pb/206Pb a	±2σ abs	% disc b	U mass (pg)	Th/U c	Pb* (pg) d	Pbc (pg) e	Pb*/Pbc f	206Pb/204Pb g	206Pb/238U h	±2σ %	207Pb/235U h	±2σ %	207Pb/206Pb h	±2σ %	Corr. coef.	ET2535 mass (mg)
Large pieces
z1	190 °C 14 h					708.76	0.543558	709.781	0.466366	713.012	0.858038	0.596276	2137.55	0.369645	251.536	0.561632	447.866	27492	0.116218	0.0809847	1.0118	0.0913247	0.06317	0.0241495	0.897001	6.82
z2	190 °C 14 h					709.044	0.191192	710.456	0.232639	714.919	0.697207	0.821772	6686.79	0.415878	796.857	0.352183	2262.63	137134	0.116267	0.0284749	1.01313	0.0455259	0.0632268	0.00547034	0.696667	6.82
z3	190 °C 14 h					710.225	0.380617	710.936	0.361322	713.181	0.884536	0.414402	1276.38	0.342911	149.462	0.346976	430.757	26630.6	0.116472	0.0565974	1.01409	0.0706754	0.063175	0.026183	0.808175	7.34
z4	190 °C 14 h					710.629	0.82667	711.171	0.65676	712.885	0.735625	0.316458	3811.72	0.557391	472.1	0.461486	1023	59807.5	0.116542	0.122859	1.01455	0.128434	0.0631663	0.0122927	0.963012	7.86
z5	190 °C 14 h					710.825	0.237955	711.479	0.258617	713.541	0.734165	0.38057	2897.85	0.352593	340.514	0.361764	941.262	58019.8	0.116576	0.0353554	1.01516	0.0505593	0.0631858	0.0121084	0.730715	7.12
z6	190 °C 14 h					710.753	1.97844	711.72	1.6062	714.772	2.23325	0.56232	342.62	0.361898	40.3561	0.335386	120.328	7414.63	0.116563	0.293986	1.01564	0.313938	0.0632224	0.100021	0.942285	7.34
z7	190 °C 14 h					711.364	0.360886	711.855	0.337814	713.407	0.736608	0.286377	4256.56	0.376484	503.741	0.416455	1209.59	74085.3	0.116669	0.0535821	1.01591	0.0660183	0.0631818	0.0124306	0.851993	6.32
z8	190 °C 14 h					708.312	0.520123	709.138	0.442541	711.752	0.819567	0.483244	809.51	0.473311	97.8006	0.166437	587.612	35104.4	0.116141	0.0775394	1.01052	0.0867134	0.0631326	0.0209679	0.895686	7.97
z9	190 °C 14 h					699.784	1.18419	702.736	0.953915	712.185	1.23612	1.7413	340.829	0.554586	41.5069	0.178613	232.384	13608.8	0.114665	0.178574	0.997886	0.188092	0.0631455	0.0483293	0.950989	7.38
Small non-irradiated shards
sh1	190 °C 14 h					708.792	1.49381	710.453	2.05557	715.708	6.85592	0.966313	72.9888	0.557666	9.01671	0.26968	33.4348	1972.25	0.116224	0.222553	1.01313	0.402262	0.0632502	0.321153	0.598485	7.43
sh2	190 °C 14 h					699.4	3.76147	703.39	3.15655	716.153	5.26212	2.33929	61.2986	0.354831	7.08587	0.165762	42.7473	2650.69	0.114599	0.567516	0.999173	0.622003	0.0632635	0.245638	0.917257	6.68
sh3	190 °C 14 h					703.678	9.2754	704.759	10.2857	708.204	30.2939	0.639136	11.5583	0.404094	1.36199	0.184035	7.4007	468.387	0.115339	1.39138	1.00187	2.02409	0.0630273	1.42413	0.710809	7.48
sh4	190 °C 14 h					697.701	4.64044	703.845	6.36153	723.505	21.2939	3.56656	23.0401	0.55229	2.79625	0.26444	10.5743	637.043	0.114305	0.701746	1.00007	1.25299	0.063483	1.00328	0.599818	7.86
sh5	190 °C 14 h					637.072	5.91084	655.81	9.6047	720.811	35.5011	11.6173	16.7724	0.435849	1.79606	0.292717	6.13585	388.144	0.103874	0.974414	0.907654	1.98808	0.0634024	1.67248	0.542971	6.29
sh6	190 °C 14 h					560.779	70.5479	683.827	192.659	1113.11	695.784	49.6206	1.25191	0.624376	0.124447	0.487546	0.255253	32.9528	0.0908867	13.1355	0.961024	38.7175	0.0767232	34.8483	0.449475	6.68
PFIB microsamples		Microsample dimensions (µm) *	Microsample volume (µm3)	FIB-damaged volume (%)	Surface area to volume ratio (µm-1)
ms1	190 °C 14 h	60 x 40 x 30	81332.7	0.667712	0.114638	578.144	28.031	648.217	61.3477	900.535	233.714	35.7999	3.21226	0.459307	0.314217	0.374818	0.838318	68.4039	0.0938292	5.06911	0.893442	12.8042	0.0690909	11.3329	0.471513	6.5
ms2	190 °C 14 h	60 x 30 x 30	59397	0.742121	0.136321	692.97	50.551	714.967	58.3673	784.647	168.28	11.6839	2.09212	0.461569	0.246717	0.177307	1.39147	101.631	0.113487	7.69394	1.0221	11.3723	0.0653487	8.01155	0.710533	6.5
ms3	190 °C 14 h	50 x 40 x 30	67777.2	0.693705	0.115031	694.132	11.2654	705.43	11.8075	741.57	32.1197	6.39689	9.39188	0.576783	1.14123	0.159752	7.14377	433.603	0.113688	1.71189	1.00319	2.32202	0.0640267	1.51824	0.756751	6.4
ms4	190 °C 14 h	50 x 40 x 20	48412.3	0.827622	0.139561	586.509	11.2758	617.827	16.3138	734.313	58.7413	20.1282	8.04436	0.574989	0.819131	0.204448	4.00654	251.239	0.0952495	2.01131	0.837611	3.52482	0.0638076	2.77376	0.618866	6.1
ms5	190 °C 14 h	50 x 40 x 40	87142.1	0.619306	0.101403	600.356	14.303	635.334	26.504	761.821	103.024	21.1946	6.50886	0.595432	0.683044	0.282556	2.41738	158.11	0.0976047	2.49508	0.86957	5.612	0.0646437	4.88674	0.494156	6.4
ms6	190 °C 14 h	50 x 40 x 40	87142.1	0.619306	0.101403	708.657	23.5623	735.056	28.8823	816.377	85.936	13.1949	4.59062	0.603214	0.574918	0.235516	2.44109	159.138	0.1162	3.51102	1.0625	5.52163	0.0663459	4.11201	0.668143	5.3
ms7	190 °C 14 h	80 x 70 x 30	193990	0.546341	0.0887808	683.098	14.3873	702.431	16.7622	764.77	48.8914	10.6794	7.26145	0.583999	0.869713	0.157242	5.53103	339.091	0.111784	2.21975	0.997285	3.30614	0.0647342	2.32	0.713633	6.5
ms8	190 °C 14 h	80 x 70 x 50	304841	0.424417	0.0672566	747.366	13.2065	746.305	11.9606	743.123	25.3427	-0.571018	8.57596	0.569984	1.12439	0.0478331	23.5065	1385.2	0.122923	1.87148	1.08548	2.26312	0.0640738	1.19804	0.848542	7.3
ms9	190 °C 14 h	50 x 40 x 30	67777.2	0.693705	0.115031	480.127	30.4406	564.935	130.084	922.967	563.841	47.9801	2.6191	0.628724	0.220687	0.230816	0.956117	72.8164	0.0773234	6.57916	0.74434	30.0229	0.0698479	27.4368	0.485711	5.96
ms10	190 °C 14 h	30 x 30 x 30	29698.5	0.871988	0.139015	614.114	8.78482	645.196	11.907	755.546	40.6741	18.7192	10.8567	0.583479	1.16288	0.213429	5.44856	334.25	0.0999497	1.4997	0.887817	2.4935	0.0644517	1.92711	0.635355	6.4
ms11	190 °C 14 h	80 x 70 x 50	304841	0.424417	0.0672566	714.709	5.03491	727.049	13.2453	765.292	48.3891	6.60969	22.2839	0.56716	2.78702	0.230487	12.0919	721.423	0.117249	0.744243	1.0463	2.55119	0.0647503	2.29635	0.470901	6.5
* Given as sides a x b x c in Fig. 5.
a Isotopic dates calculated using λ238 = 1.55125E-10 (Jaffey et al. 1971) and λ235 = 9.8485E-10 (Jaffey et al. 1971).
b % discordance = 100 - (100 * (206Pb/238U date) / (207Pb/206Pb date))
c Th contents calculated from radiogenic 208Pb and 230Th-corrected 206Pb/238U date of the sample, assuming concordance between U-Pb Th-Pb systems.
d Total mass of radiogenic Pb.
e Total mass of common Pb.
f Ratio of radiogenic Pb (including 208Pb) to common Pb.
g Measured ratio corrected for fractionation and spike contribution only.
h Measured ratios corrected for fractionation, tracer and blank.
GZ7 zircon
						Dates (Ma)							Composition					Isotopic Ratios
	Chemical abrasion					206Pb/238U a	±2σ abs	207Pb/235U a	±2σ abs	207Pb/206Pb a	±2σ abs	% disc b	U mass (pg)	Th/U c	Pb* (pg) d	Pbc (pg) e	Pb*/Pbc f	206Pb/204Pb g	206Pb/238U h	±2σ %	207Pb/235U h	±2σ %	207Pb/206Pb h	±2σ %	Corr. coef.	ET2535 mass (mg)
Large pieces
z1	190 °C 14 h					529.98	0.15	530.55	0.53	533	2.6	0.56	1247.45	0.89	123	1.15	106.98	5793	0.085688	0.0301	0.68625	0.129	0.058111	0.116	0.392	7.98
z2	190 °C 14 h					529.89	0.18	530.47	0.27	533	1.2	0.58	1008.93	0.89	99.4	0.34	291.43	15760	0.085672	0.0349	0.686133	0.065	0.058112	0.044	0.55	8.09
z3	190 °C 14 h					529.99	0.13	530.55	0.35	533	1.7	0.56	2266.93	0.89	223.53	1.31	171.19	9259	0.085689	0.0255	0.686259	0.085	0.058111	0.071	0.407	6.79
z4	190 °C 14 h					530.18	0.2	530.6	0.26	532.4	1.1	0.42	2042.81	0.9	201.7	0.6	334.99	18082	0.085721	0.0388	0.686347	0.064	0.058097	0.036	0.643	6.49
z5	190 °C 14 h					529.87	0.34	530.34	0.33	532.37	0.86	0.47	2946.23	0.9	290.61	0.32	915.26	49392	0.085669	0.0659	0.685914	0.08	0.058095	0.022	0.874	4.6
z6	190 °C 14 h					529.91	0.15	530.49	0.2	532.98	0.75	0.58	8587.37	0.89	846.84	0.61	1386.24	74824	0.085676	0.0287	0.686161	0.049	0.058111	0.011	0.737	4.15
z7	190 °C 14 h					529.79	0.2	530.39	0.23	532.96	0.72	0.6	9032.43	0.9	890.55	0.2	4475.11	241498	0.085655	0.0394	0.685985	0.056	0.058111	0.006	0.813	4.12
Small non-irradiated shards
sh1	190 °C 14 h					529.693	0.258601	530.242	0.452577	532.605	2.06706	0.546825	361.362	0.892414	35.5997	0.252808	140.817	7621.72	0.0856388	0.0508542	0.685746	0.10957	0.0581012	0.088671	0.509856	6.39
sh2	190 °C 14 h					530.07	0.192371	530.398	0.359429	531.807	1.65861	0.326584	560.992	0.892471	55.3071	0.291572	189.685	10260.4	0.0857024	0.0378042	0.686006	0.086999	0.0580801	0.0684671	0.496053	7.05
sh3	190 °C 14 h					529.863	0.578503	531.425	1.81814	538.138	9.00312	1.53756	149.677	0.892026	14.7507	0.474947	31.0575	1695.34	0.0856676	0.113728	0.687713	0.43943	0.0582483	0.410238	0.367078	6.33
PFIB microsamples		Microsample dimensions (µm) *	Microsample volume (µm3)	FIB-damaged volume (%)	Surface area to volume ratio (µm-1)
ms1	190 °C 14 h	70 x 50 x 70	275570	0.418906	0.0687258	529.98	0.19	530.6	0.27	533.3	1.2	0.62	606.52	0.89	59.7	0.18	326.26	17659	0.085687	0.0369	0.686348	0.066	0.058119	0.042	0.597	7.4
ms2	190 °C 14 h	70 x 40 x 60	178998	0.491395	0.0850529	529.76	0.21	530.42	0.31	533.3	1.3	0.66	500.03	0.89	49.19	0.2	247.83	13419	0.08565	0.0418	0.686044	0.075	0.058119	0.051	0.596	3
ms3	190 °C 14 h	100 x 80 x 70	607046	0.331656	0.0526627	530.04	0.5	530.56	0.46	532.8	1.1	0.52	927.02	0.89	91.28	0.17	549.44	29721	0.085697	0.0979	0.68627	0.111	0.058106	0.036	0.899	3.5
ms4	190 °C 14 h	65 x 50 x 65	242509	0.436235	0.0704432	528.11	0.37	528.98	0.38	532.7	1.2	0.86	771.61	0.88	75.65	0.24	310.07	16790	0.085372	0.072	0.683647	0.092	0.058104	0.045	0.8	5
ms5	190 °C 14 h	65 x 35 x 55	131589	0.548238	0.0974492	528.64	0.38	529.52	0.49	533.3	2	0.88	354.83	0.89	34.83	0.18	189.43	10263	0.085461	0.0752	0.684554	0.118	0.058121	0.083	0.657	5.4
ms6	190 °C 14 h	55 x 25 x 60	87182.3	0.64768	0.121605	529.72	0.42	530.47	0.55	533.7	2.1	0.74	203.86	0.88	20.05	0.13	150.26	8146	0.085644	0.0834	0.686119	0.132	0.058129	0.092	0.673	5.79
ms7	190 °C 14 h	70 x 45 x 65	225195	0.45099	0.075844	530.09	0.23	530.7	0.3	533.3	1.2	0.6	432.44	0.89	42.57	0.12	348.35	18855	0.085706	0.0454	0.686502	0.072	0.05812	0.043	0.666	6.2
ms8	190 °C 14 h	50 x 20 x 40	41152.8	0.84724	0.167748	528.97	0.7	530.02	0.84	534.5	3.2	1.04	121.17	0.89	11.9	0.13	93.66	5082	0.085517	0.139	0.685379	0.205	0.058153	0.143	0.696	5.4
ms9	190 °C 14 h	40 x 18 x 40	26549.8	0.985235	0.198103	528.69	0.89	529.7	1.1	533.9	4	0.97	92.68	0.89	9.1	0.12	75.2	4084	0.08547	0.176	0.68479	0.259	0.058135	0.182	0.701	4.07
ms10	190 °C 14 h	55 x 25 x 40	60106.2	0.728014	0.137227	529.43	0.75	531.3	1.5	539.2	7	1.82	114.41	0.89	11.26	0.29	38.81	2115	0.085594	0.147	0.68747	0.362	0.058277	0.319	0.47	4.85
ms11	190 °C 14 h	50 x 25 x 45	60719.5	0.720405	0.134618	527.74	0.42	528.91	0.61	534	2.6	1.16	226	0.89	22.16	0.19	114.7	6216	0.08531	0.0835	0.683537	0.147	0.058137	0.113	0.599	4.7
fs laser microsamples
fs1	190 °C 14 h	75 x 70 x 45	248216	14.4874	0.0979631	529.6	0.28	530.38	0.43	533.7	1.9	0.78	323.69	0.89	31.86	0.18	179.71	9728	0.085624	0.0555	0.68598	0.103	0.058131	0.078	0.574	8.19
fs2	190 °C 14 h	110 x 105 x 65	536130	10.2195	0.0688117	529.62	0.29	530.66	0.39	535.1	1.6	1.03	313.85	0.89	30.88	0.14	228.16	12351	0.085626	0.0574	0.686441	0.095	0.058169	0.066	0.633	7.52
fs3	190 °C 14 h	55 x 55 x 40	134090	18.5575
fs4	190 °C 14 h	65 x 45 x 35	133308	19.5226	0.134048	529.56	0.18	530.2	0.25	533	1	0.64	611.73	0.89	60.17	0.15	398.82	21581	0.085616	0.035	0.685676	0.06	0.058111	0.035	0.605	7.18
fs5	190 °C 14 h	50 x 25 x 30	50784	29.6843
* Given as sides a x b x c in Fig. 5.
a Isotopic dates calculated using λ238 = 1.55125E-10 (Jaffey et al. 1971) and λ235 = 9.8485E-10 (Jaffey et al. 1971).
b % discordance = 100 - (100 * (206Pb/238U date) / (207Pb/206Pb date))
c Th contents calculated from radiogenic 208Pb and 230Th-corrected 206Pb/238U date of the sample, assuming concordance between U-Pb Th-Pb systems.
d Total mass of radiogenic Pb.
e Total mass of common Pb.
f Ratio of radiogenic Pb (including 208Pb) to common Pb.
g Measured ratio corrected for fractionation and spike contribution only.
h Measured ratios corrected for fractionation, tracer and blank.
