# Supplementary material for: µID-TIMS: spatially resolved high-precision U–Pb zircon geochronology
Source: Copernicus journal article supplement (doi:10.5194/gchron-6-621-2024), 2024-11-26
Supplement: Supplementary file 3 [file gchron-6-621-2024-supplement.zip]

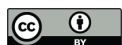

## *Supplement of*

# **μID-TIMS: spatially resolved high-precision U–Pb zircon geochronology**

**Sava Markovic et al.**

*Correspondence to:* Sava Markovic (sava.markovic@eaps.ethz.ch)

- gchron-6-621-2024-supplement-title-page.pdf
- Supplement
  - ID\_TIMS\_code.ipynb
  - ID\_TIMS\_database.csv
  - Markovic et al. (2024).xlsx
  - Supplementary Figures.pdf
- \_\_MACOSX
  - Supplement
    - \* .\_ID\_TIMS\_code.ipynb
    - \* .\_ID\_TIMS\_database.csv
    - \* .\_Markovic et al. (2024).xlsx
    - \* .\_Supplementary Figures.pdf

The copyright of individual parts of the supplement might differ from the article licence.
